# Supplementary material
Source: PubMed Central journal article supplement (PMC3195463)

### **Supplemental Data for Akilesh *et al.***

**Supplemental Movie S1.** Live cell imaging of YFP-actin transduced undifferentiated podocyte cultured at 33°C. The cell exhibits active membrane ruffling. An image was captured every 15 seconds for 20 minutes to generate the movie. Magnification 400x.

**Supplemental Movie S2.** Live cell imaging of YFP-actin transduced differentiated podocyte cultured at 37°C. The cell exhibits minimal membrane ruffling. An image was captured every 15 seconds for 20 minutes to generate the movie. Magnification 400x.

**Supplemental Movie S3.** Live cell imaging of control knockdown podocyte (fLuc) transduced with YFP-actin and differentiated at 37°C. The cell exhibits minimal membrane ruffling. An image was captured every 15 seconds for 20 minutes to generate the movie. Magnification 400x.

**Supplemental Movie S4.** Live cell imaging of Arhgap24 knockdown podocyte (line 451) transduced with YFP-actin and differentiated at 37°C. Arhgap24 knockdown results in increased membrane ruffling even after differentiation. An image was captured every 15 seconds for 20 minutes to generate the movie. Magnification 400x.

**Supplemental Movie S5.** Live cell imaging of Arhgap24 knockdown podocyte (line 756) transduced with YFP-actin and differentiated at 37°C. Arhgap24 knockdown results in increased membrane ruffling even after differentiation. An image was captured every 15 seconds for 20 minutes to generate the movie. Magnification 400x.

## Supplemental Figure Legends

**Supplemental Figure 1** Hamster and rabbit antisera are specific for Arhgap24. **(A)** HEK293 cells were transfected with FLAG-tagged Arhgap24 (+) or left untransfected (–). Cell lysates were then immunoblotted with Armenian hamster antiserum generated against Arhgap24. This antiserum detects the predicted 95 kD band. Preabsorption of the antiserum with GST-Arhgap24 quenches the signal. **(B)** Cultured podocytes (600x magnification) and **(C)** mouse glomeruli (200x magnification) were stained with rabbit antiserum generated against Arhgap24. The specific staining is abolished by preincubating the antiserum with GST-Arhgap24 antigen.

**Supplemental Figure 2** Arhgap24 is expressed in the E13 embryonic kidney. Arhgap24 is expressed in the comma (C), S-shaped body (S) and capillary loop (Cap) stages of glomerular development and co-localizes with synaptopodin, a marker of podocytes. Original magnification 200x.

**Supplemental Figure 3** Pedigree information for T97I and P417A variations. DNAs from one family for the T97I variation and three families for the P417A variation were available for sequence analysis. The presence of kidney disease (clinical and/or biopsy proven) is denoted by the filled-in symbols. If DNA was analyzed for sequence variation, the result of a non-synonymous variation is denoted within the individuals symbol (Wt = wildtype; Ht = heterozygous). The reference protein sequence (NP\_001020787) was

considered wildtype. In no instance did the variation consistently correlate with kidney disease.

**Supplemental Figure 4** Sequencing chromatogram of *ARHGAP24* from the proband of the family depicted in Figure 6 of the main text. The first four rows represent forward and reverse sequencing across codon 158 in the two siblings with FSGS. Both individuals are heterozygous at this position. Sequencing of the same region in the forward direction is shown in rows five and six for two control individuals. The CAG → CGG change results in a substitution of arginine for glutamine (Q158R).

**Supplemental Table 1.** Non-synonymous SNPs identified in the transcript of isoform 1 of *ARHGAP24* from over a 1000 human genomes sequenced (www.1000genomes.org). SNPs in bold are known polymorphisms in the gene.

| <u>Residue</u> | <u>SNP ID</u>       | <u>Alleles</u> |
|----------------|---------------------|----------------|
| R142H          | rs36067390          | G/A            |
| Q359R          | LWK_P3:4:87134907:G | A/G            |
| D368G          | YRI_P3:4:87134934:G | A/G            |
| <b>P417A</b>   | rs35521695          | C/G            |
| V420I          | LWK_P3:4:87135089:A | G/A            |
| K421Q          | YRI_P3:4:87135092:C | A/C            |
| G473V          | YRI_P3:4:87135249:T | G/T            |
| R483H          | LWK_P3:4:87135279:A | G/A            |
| R499Q          | TSL_P3:4:87135327:A | G/A            |
| <b>F539L</b>   | YRI_P1:4:87135446:C | T/C            |
| G618S          | CEU_P3:4:87135683:A | G/A            |
| R622H          | JPT_P3:4:87135696:A | G/A            |
| M696K          | JPT_P3:4:87140739:A | T/A            |
| E721*          | rs13292             | G/T            |

**Supplemental Table 2.** List of genes that are differentially expressed by at least five-fold between undifferentiated and differentiated cultured podocytes. Arhgap24 was chosen for further analysis given the magnitude of upregulation upon differentiation and by examination of the probeset hybridization pattern. See main text for additional details.

| <u>Probe Set</u>    | <u>Gene</u>                                                      | <u>Accession</u> | <u>Undifferentiate<br/>d (33°C) MBEI</u> | <u>Differentiate<br/>d (37°C)<br/>MBEI</u> | <u>Fold<br/>chang<br/>e</u> |
|---------------------|------------------------------------------------------------------|------------------|------------------------------------------|--------------------------------------------|-----------------------------|
| 1423571_at          | SIpr1: sphingosine-1-phosphate receptor 1                        | BB133079         | 783.38                                   | 36.76                                      | -21.31                      |
| 1424588_at          | Srgap3: SLIT-ROBO Rho GTPase activating protein 3                | AF481964         | 71.52                                    | 755.51                                     | 10.56                       |
| <b>1424842_a_at</b> | <b>Arhgap24: Rho GTPase activating protein 24</b>                | <b>BC025502</b>  | <b>139.93</b>                            | <b>2541.26</b>                             | <b>18.16</b>                |
| 1433553_at          | Garnl3: GTPase activating RANGAP domain-like 3                   | BB131106         | 15.72                                    | 249.36                                     | 15.86                       |
| 1434911_s_at        | Arhgap19: Rho GTPase activating protein 19                       | BG072763         | 521.6                                    | 89.05                                      | -5.86                       |
| 1435033_at          | Arhgef4: Rho guanine nucleotide exchange factor (GEF) 4          | AV024939         | 71.91                                    | 359.56                                     | 5                           |
| 1456337_at          | Arap2: ArfGAP with RhoGAP domain, ankyrin repeat and PH domain 2 | AV291818         | 68.35                                    | 345.45                                     | 5.05                        |



# Supplemental Figure 1

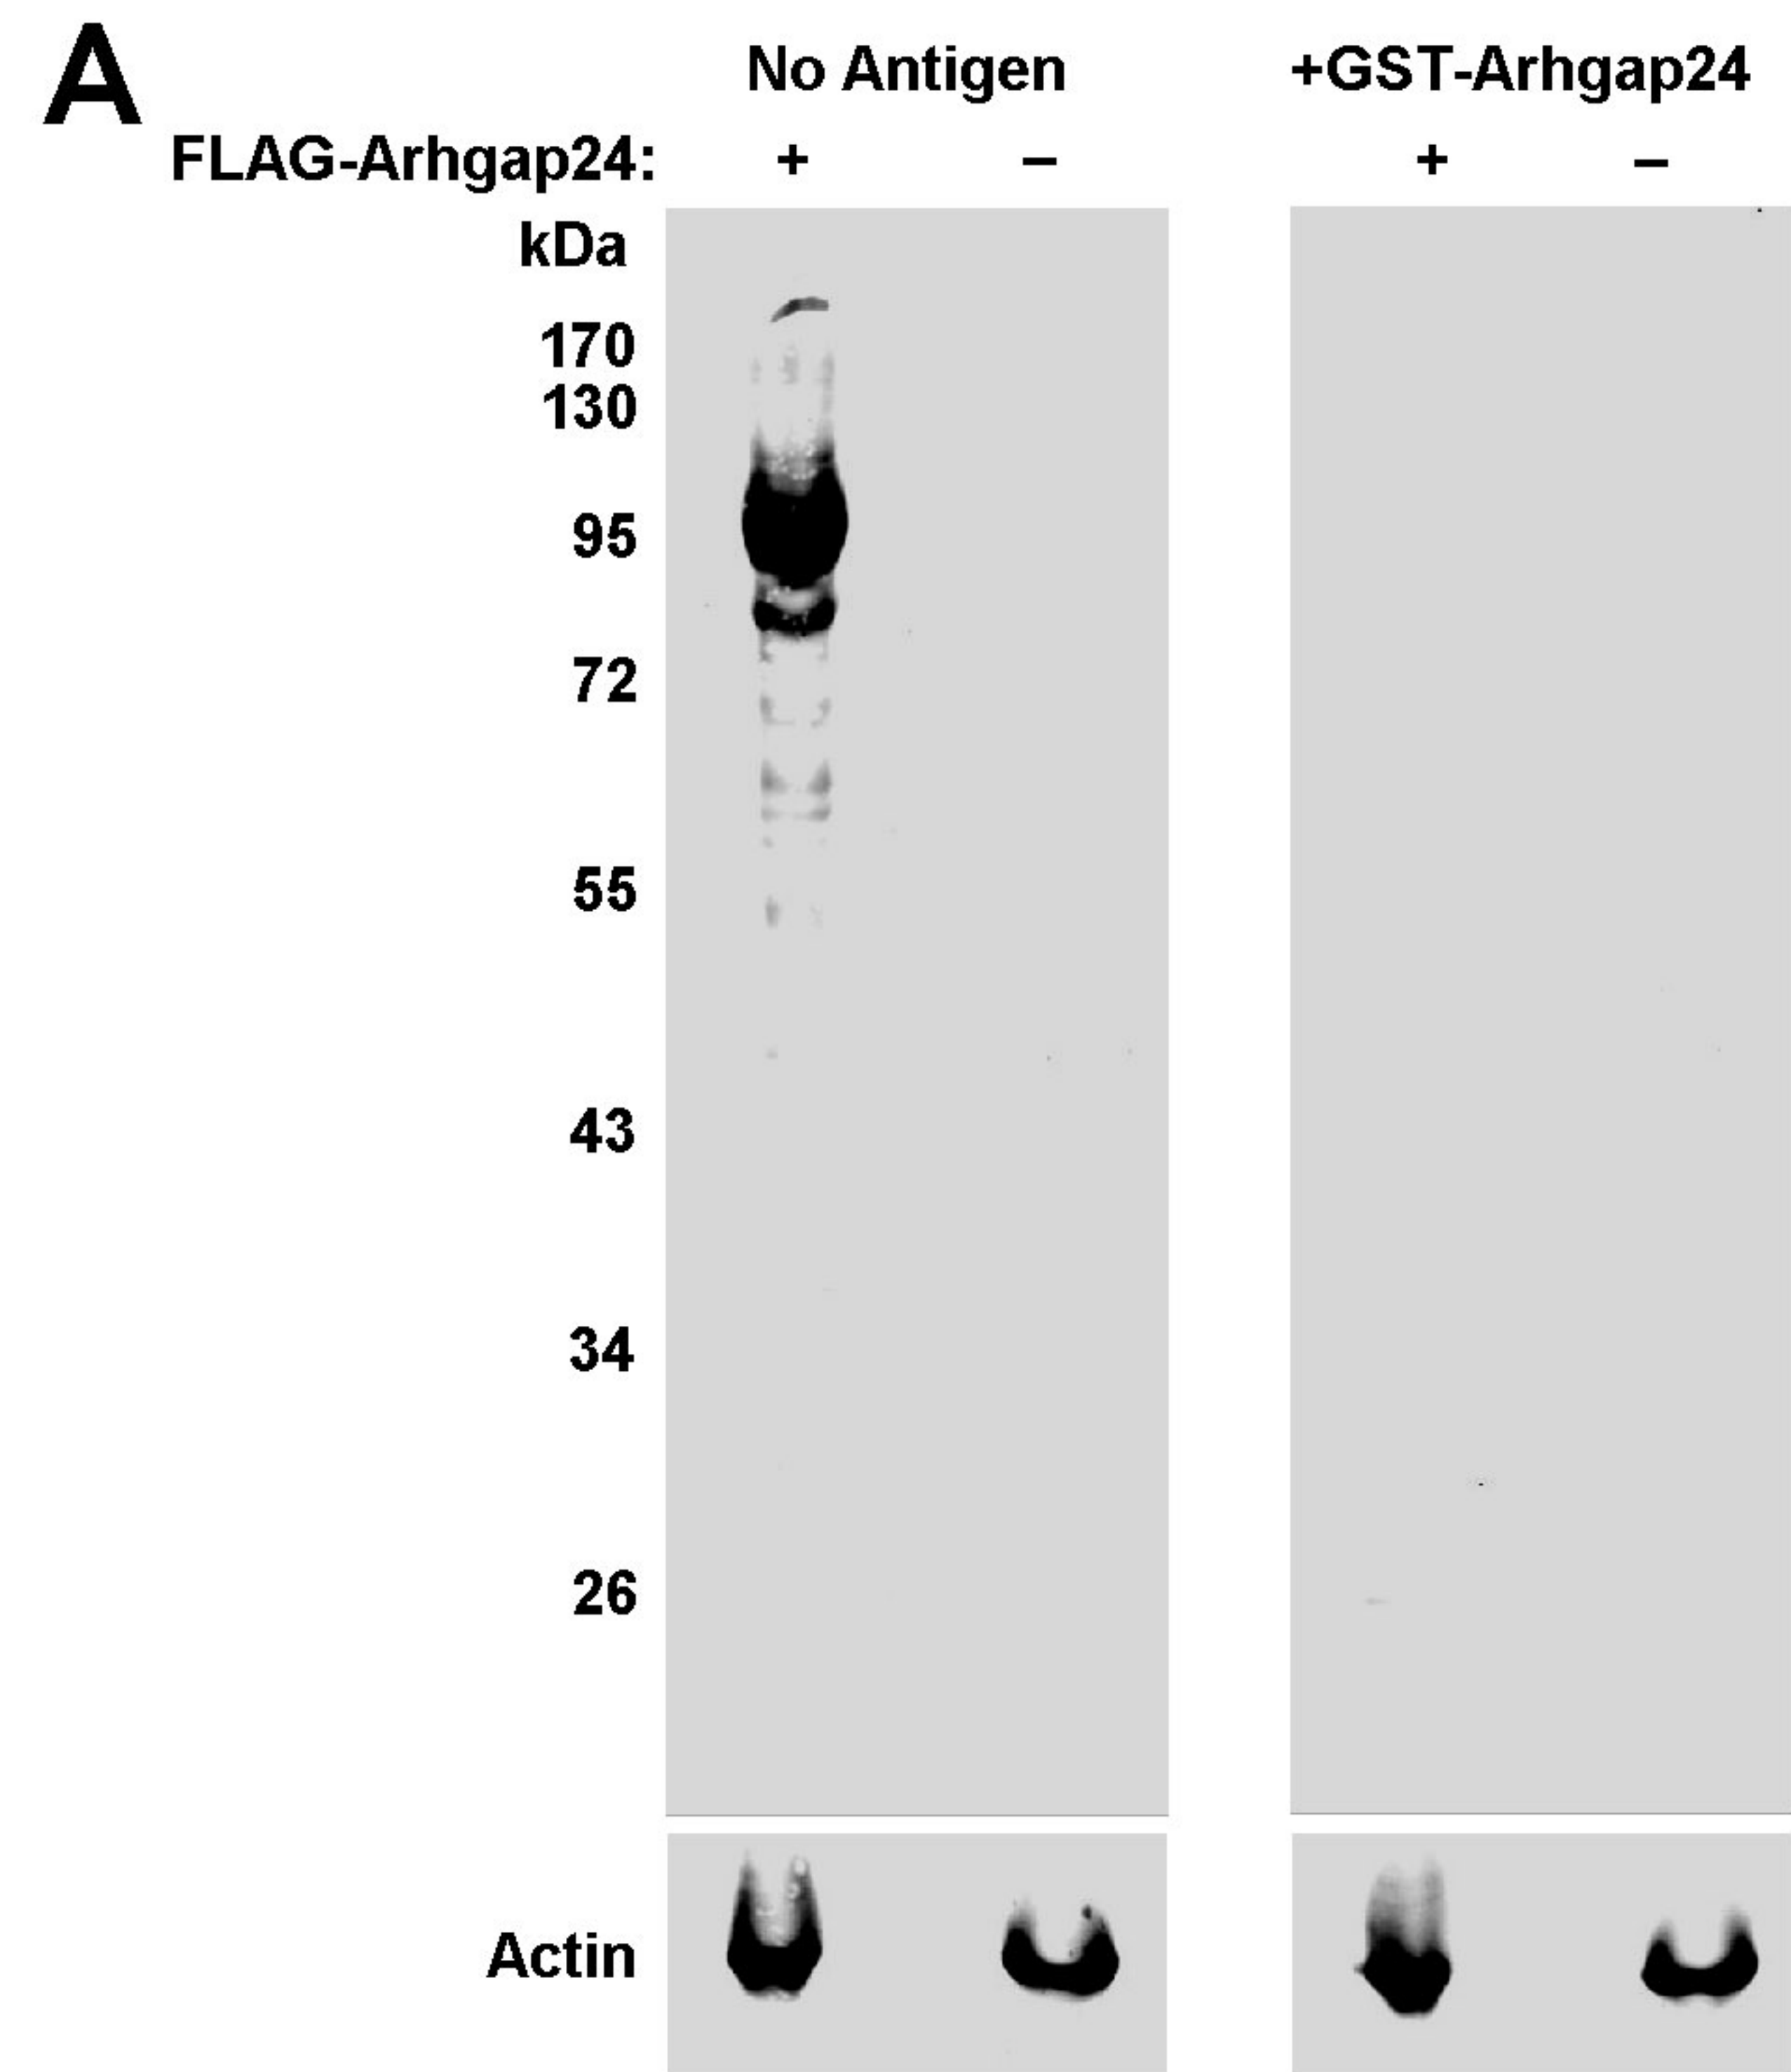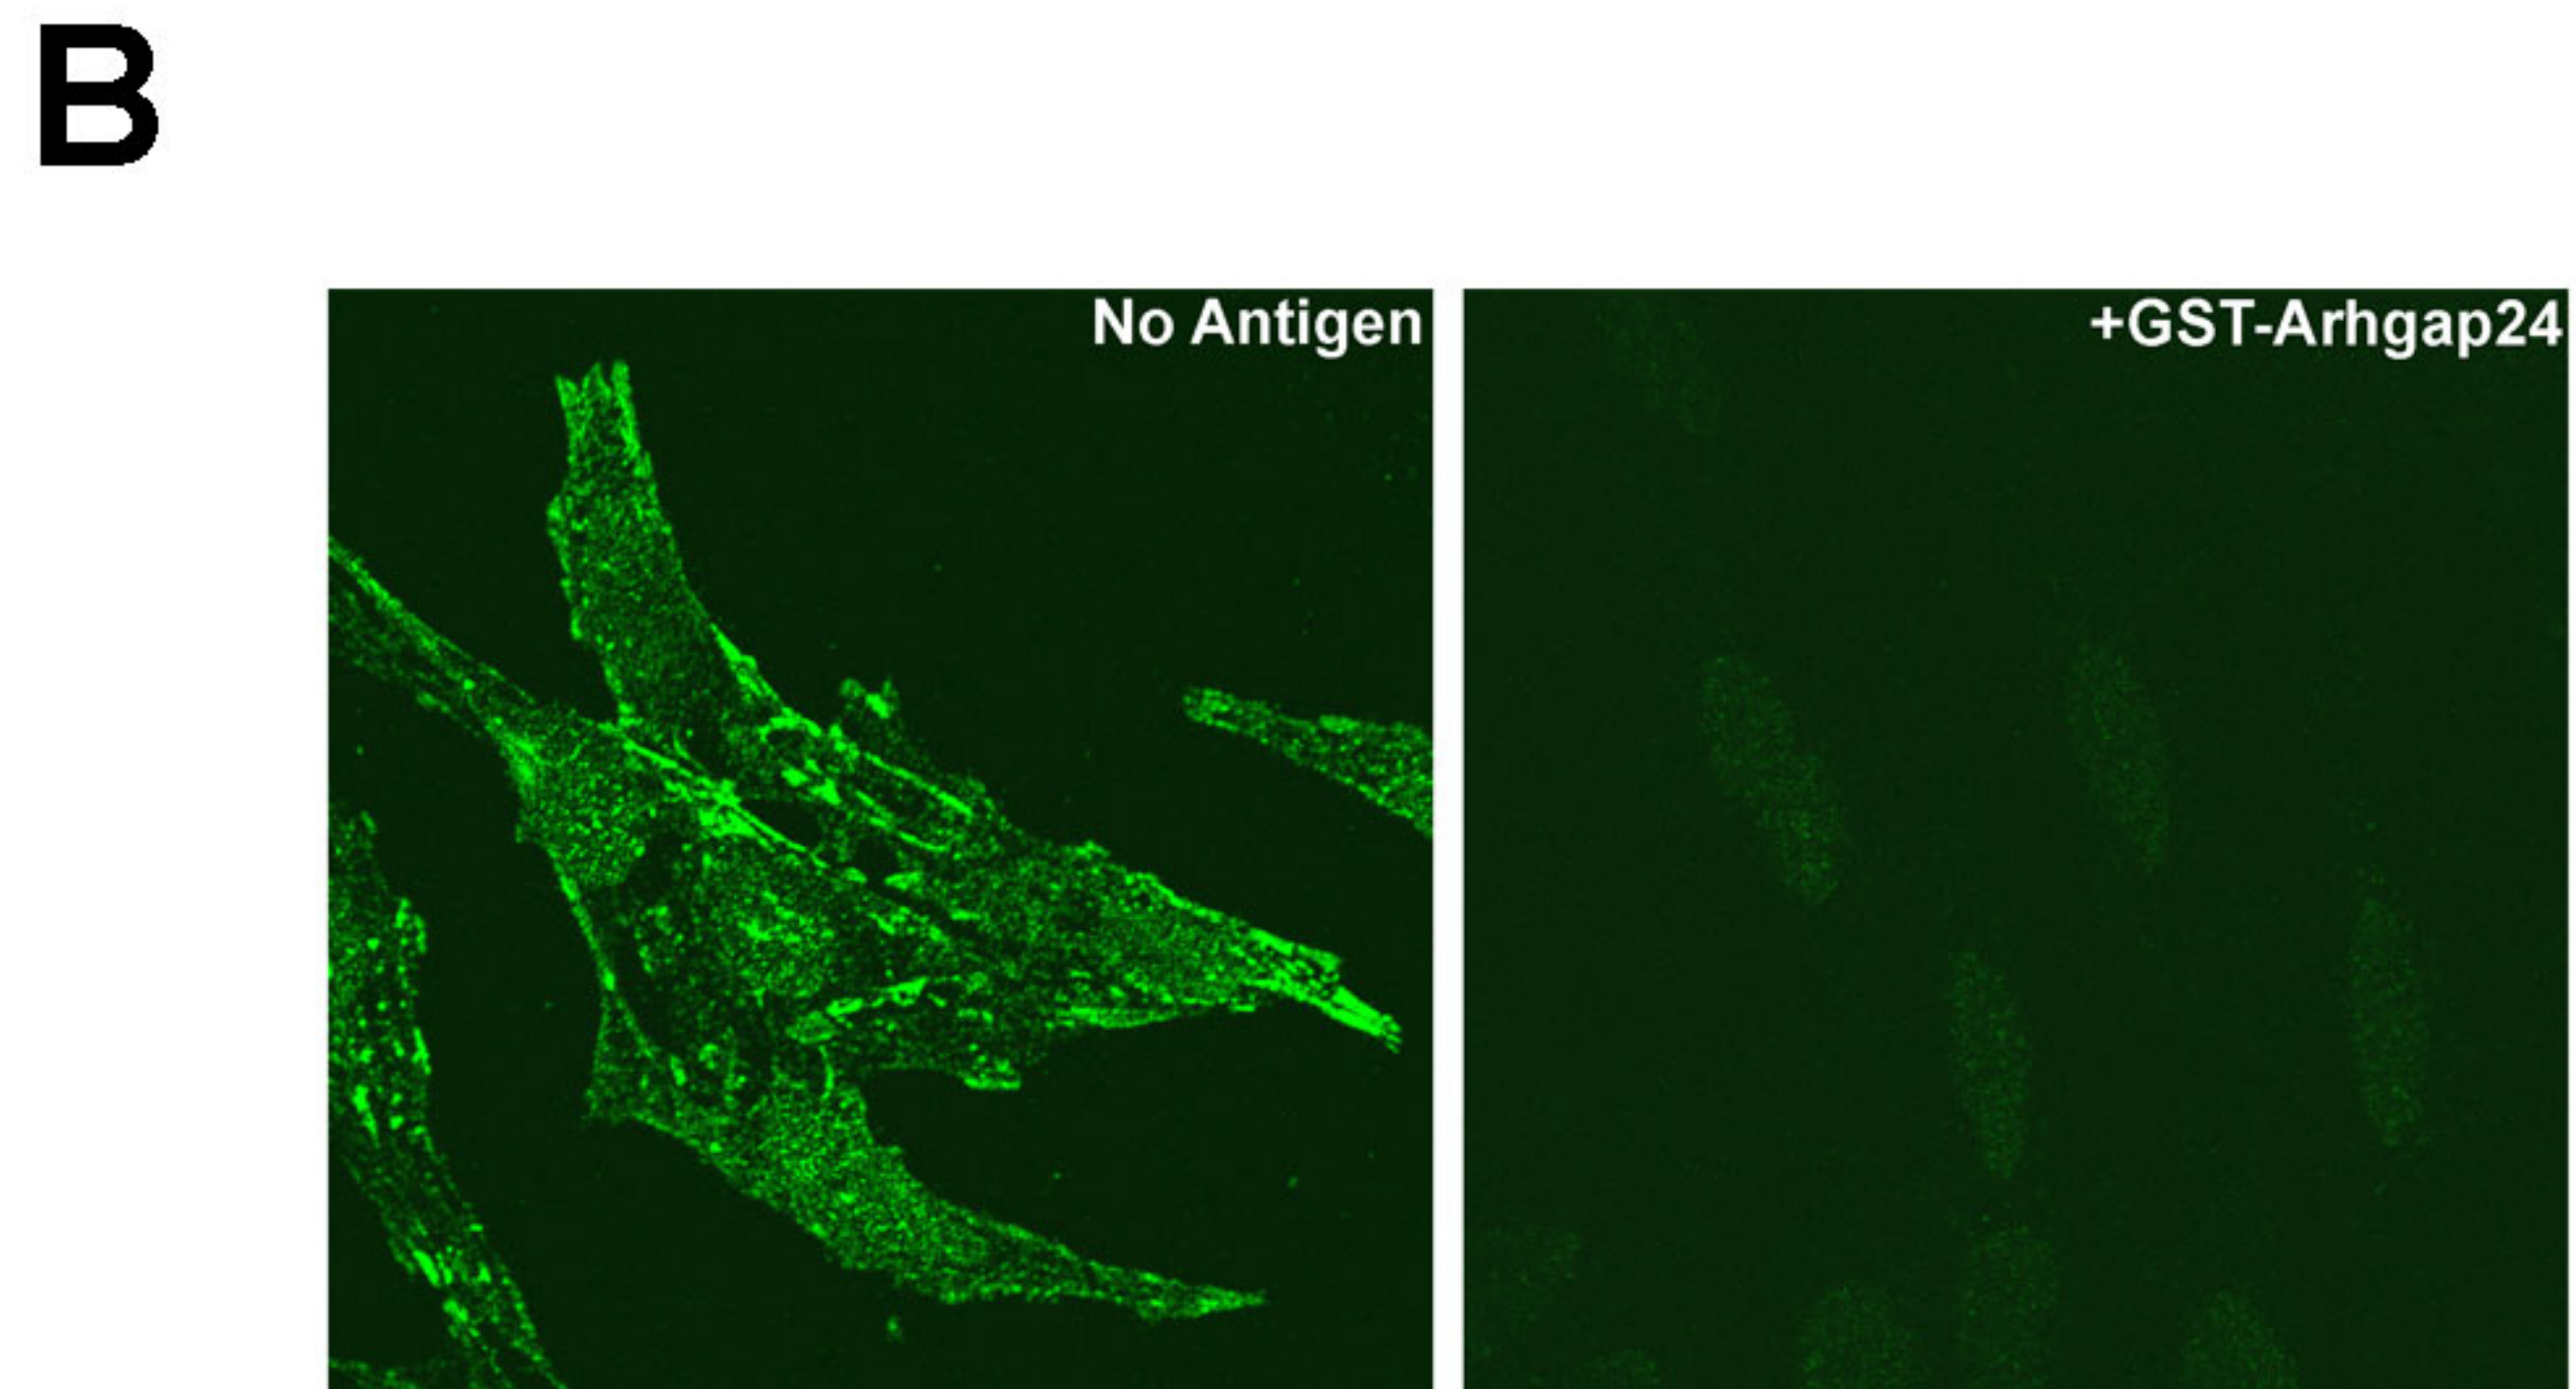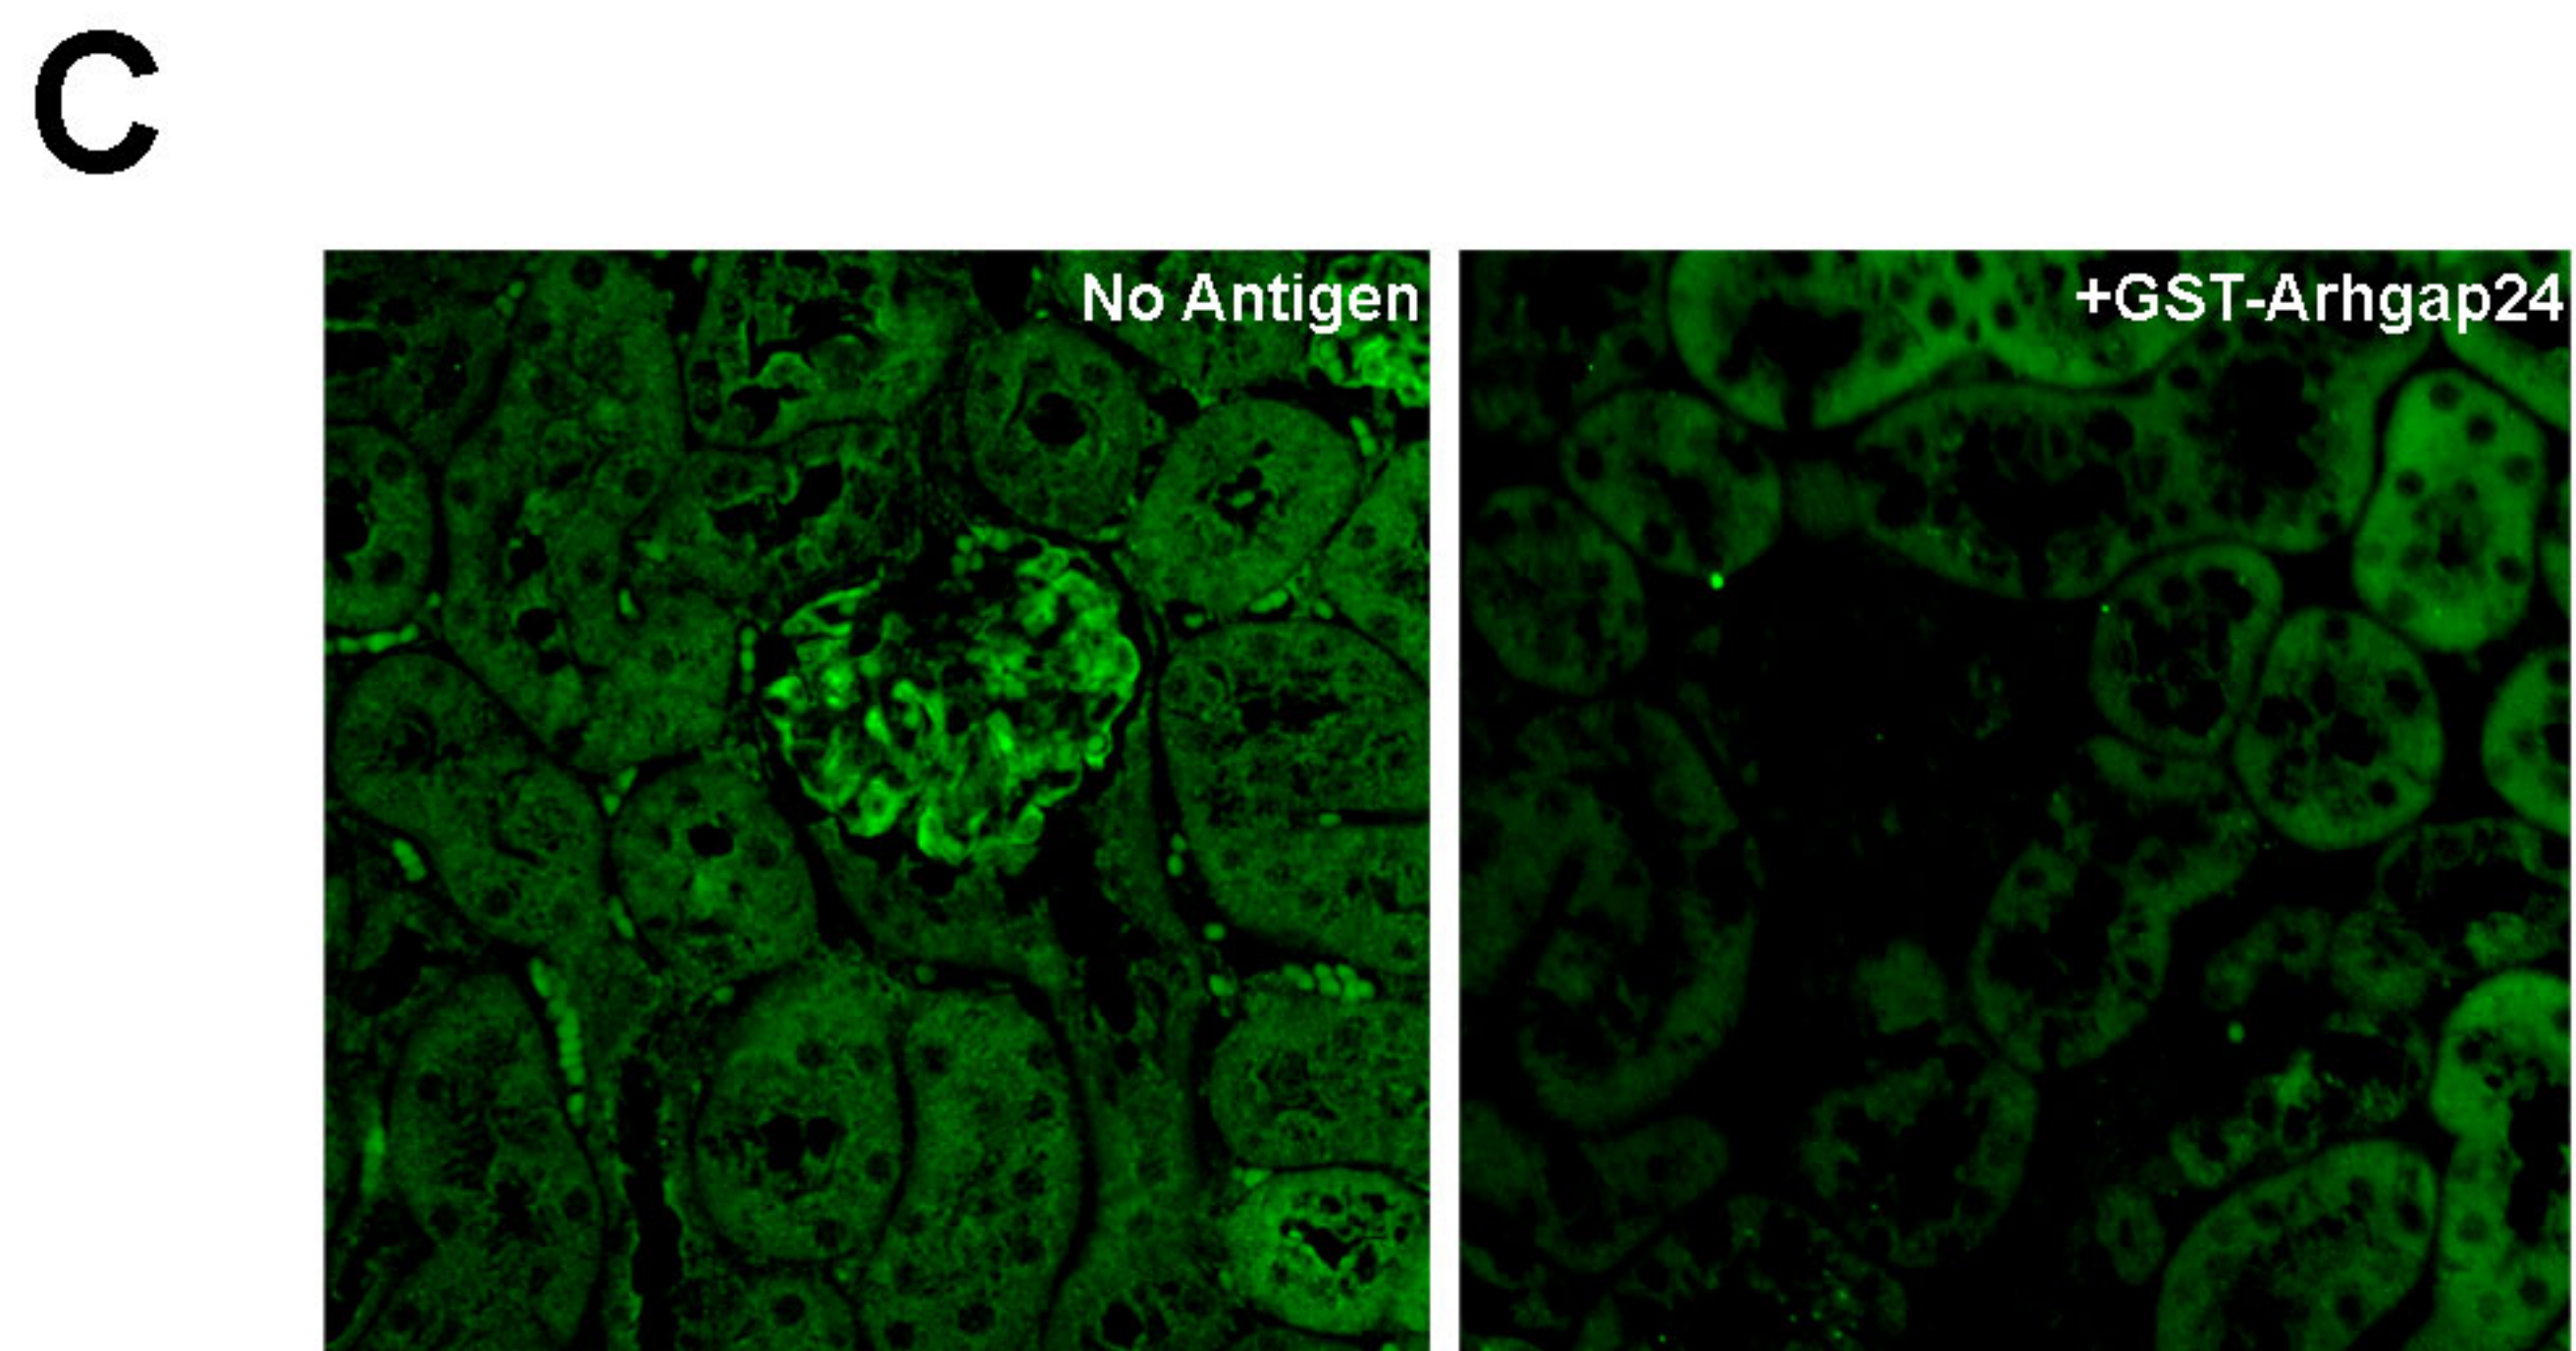



# Supplemental Figure 2

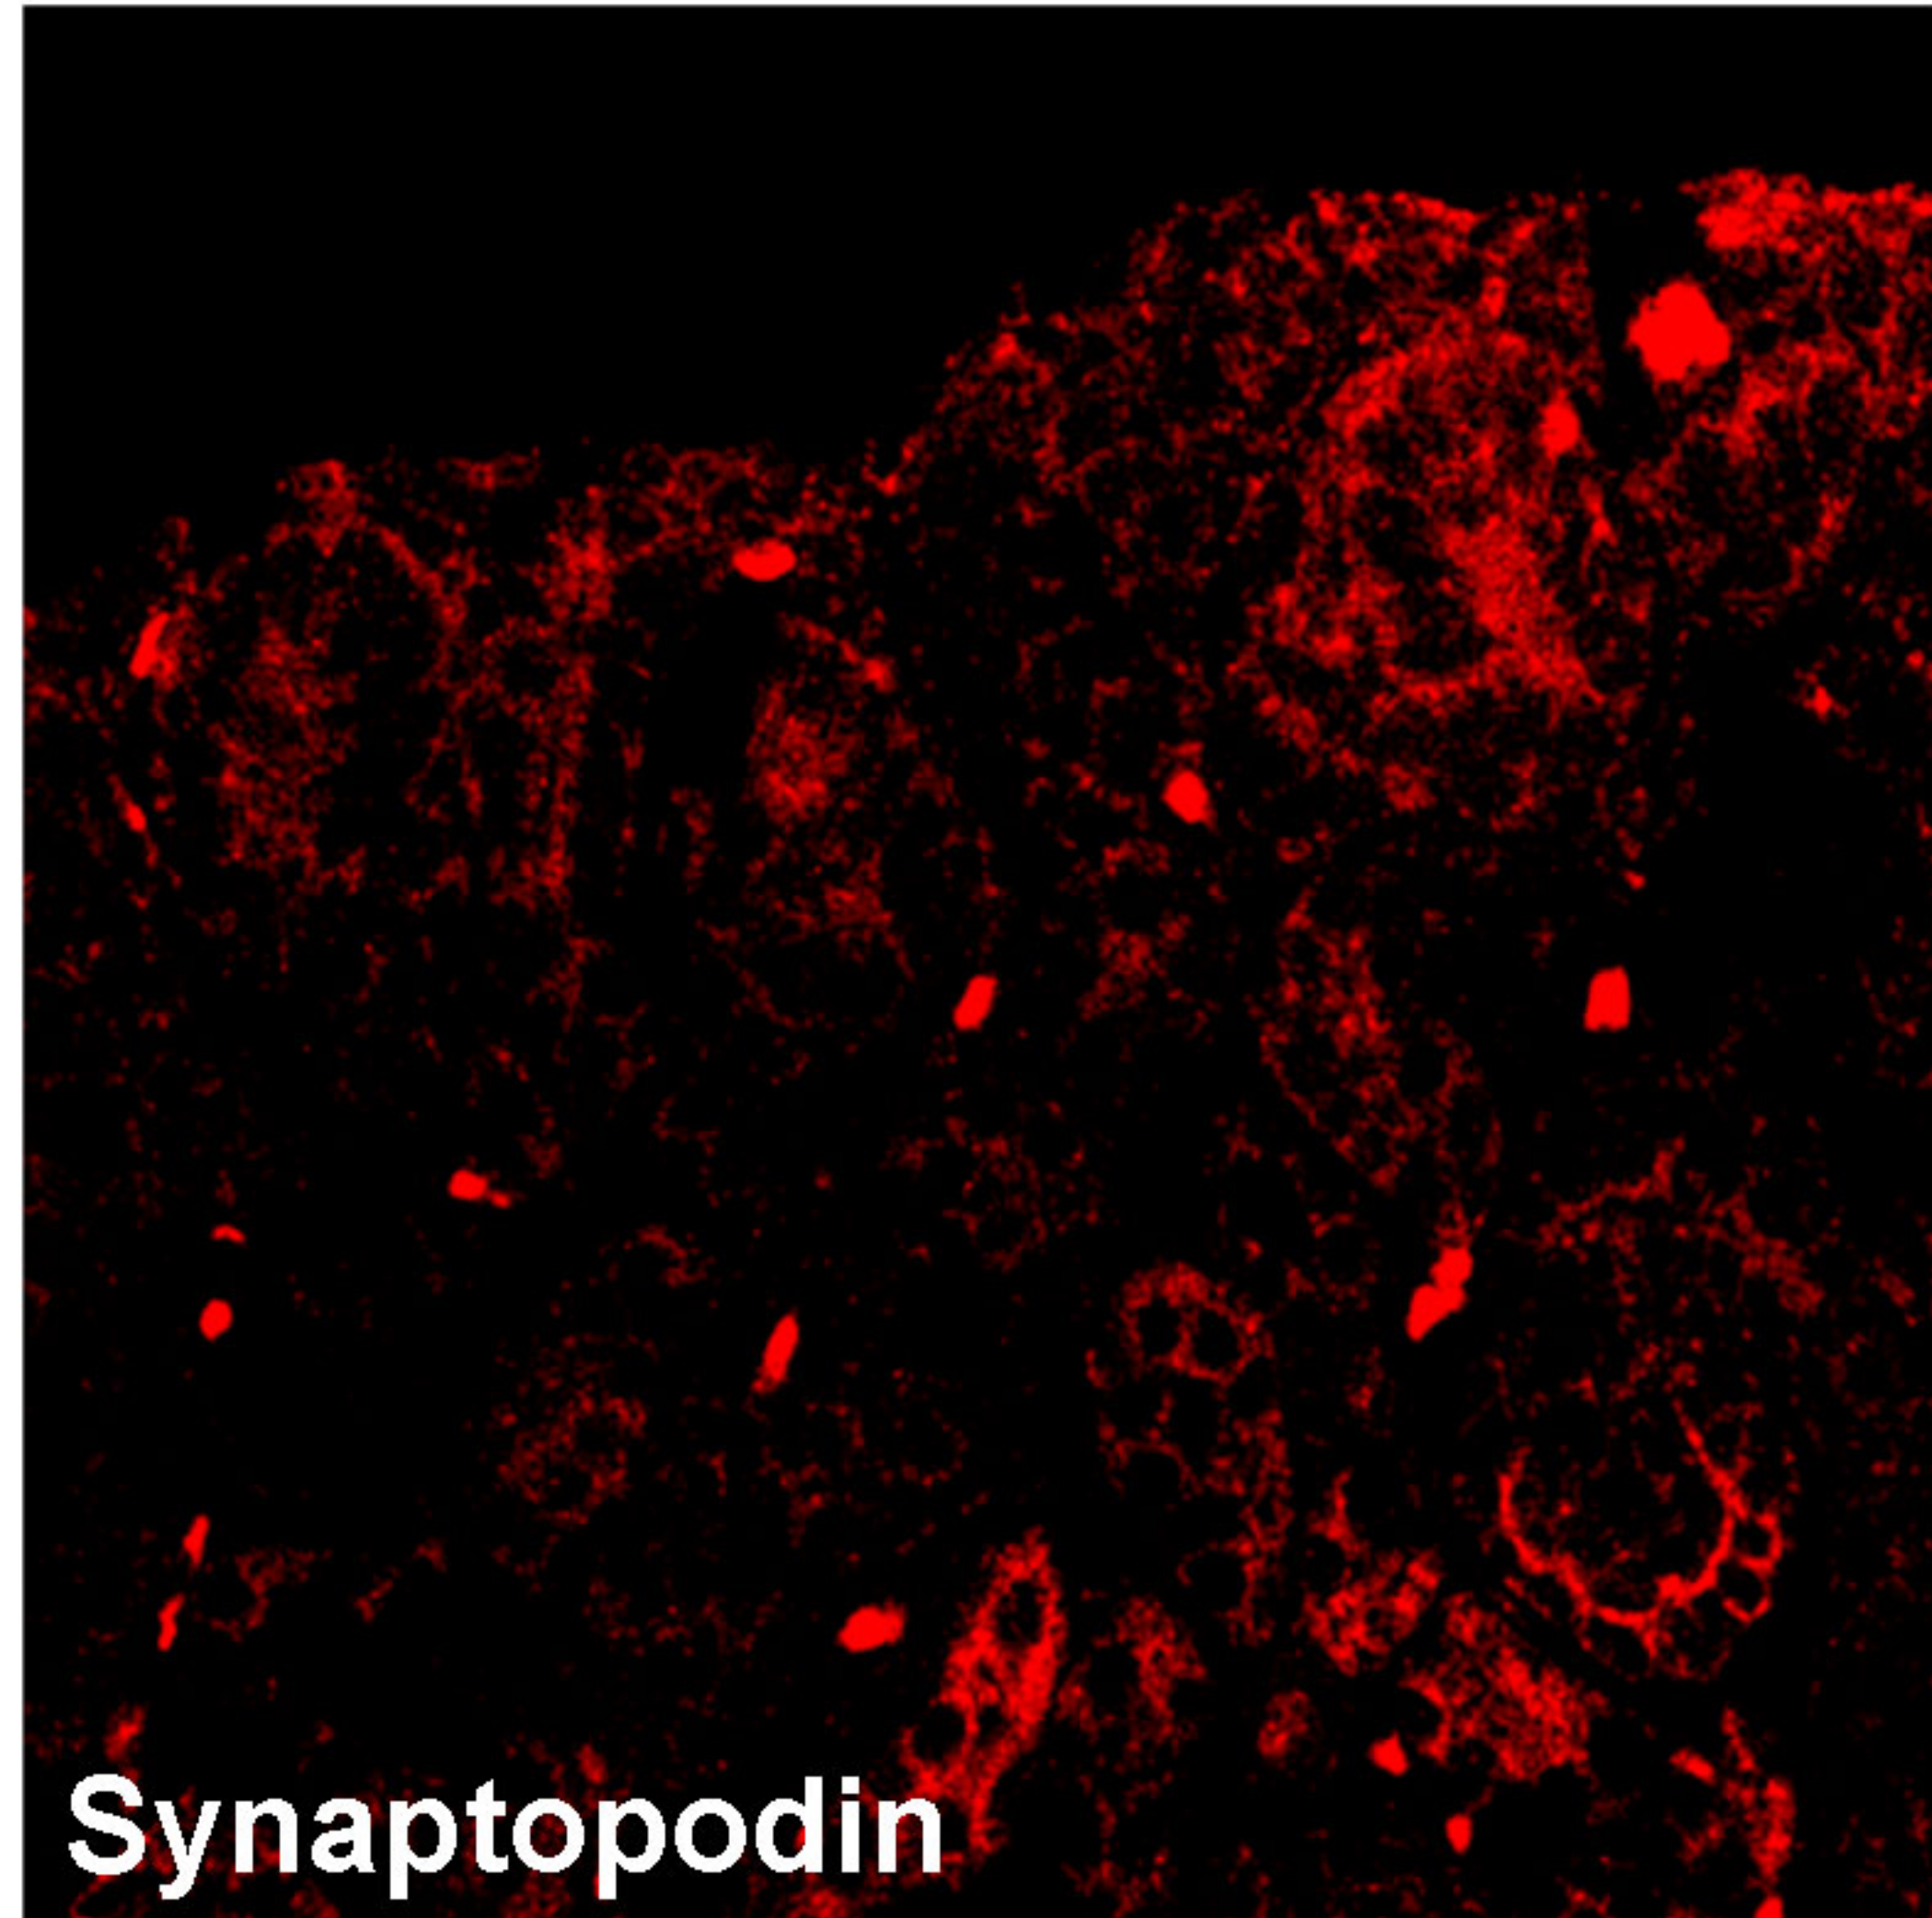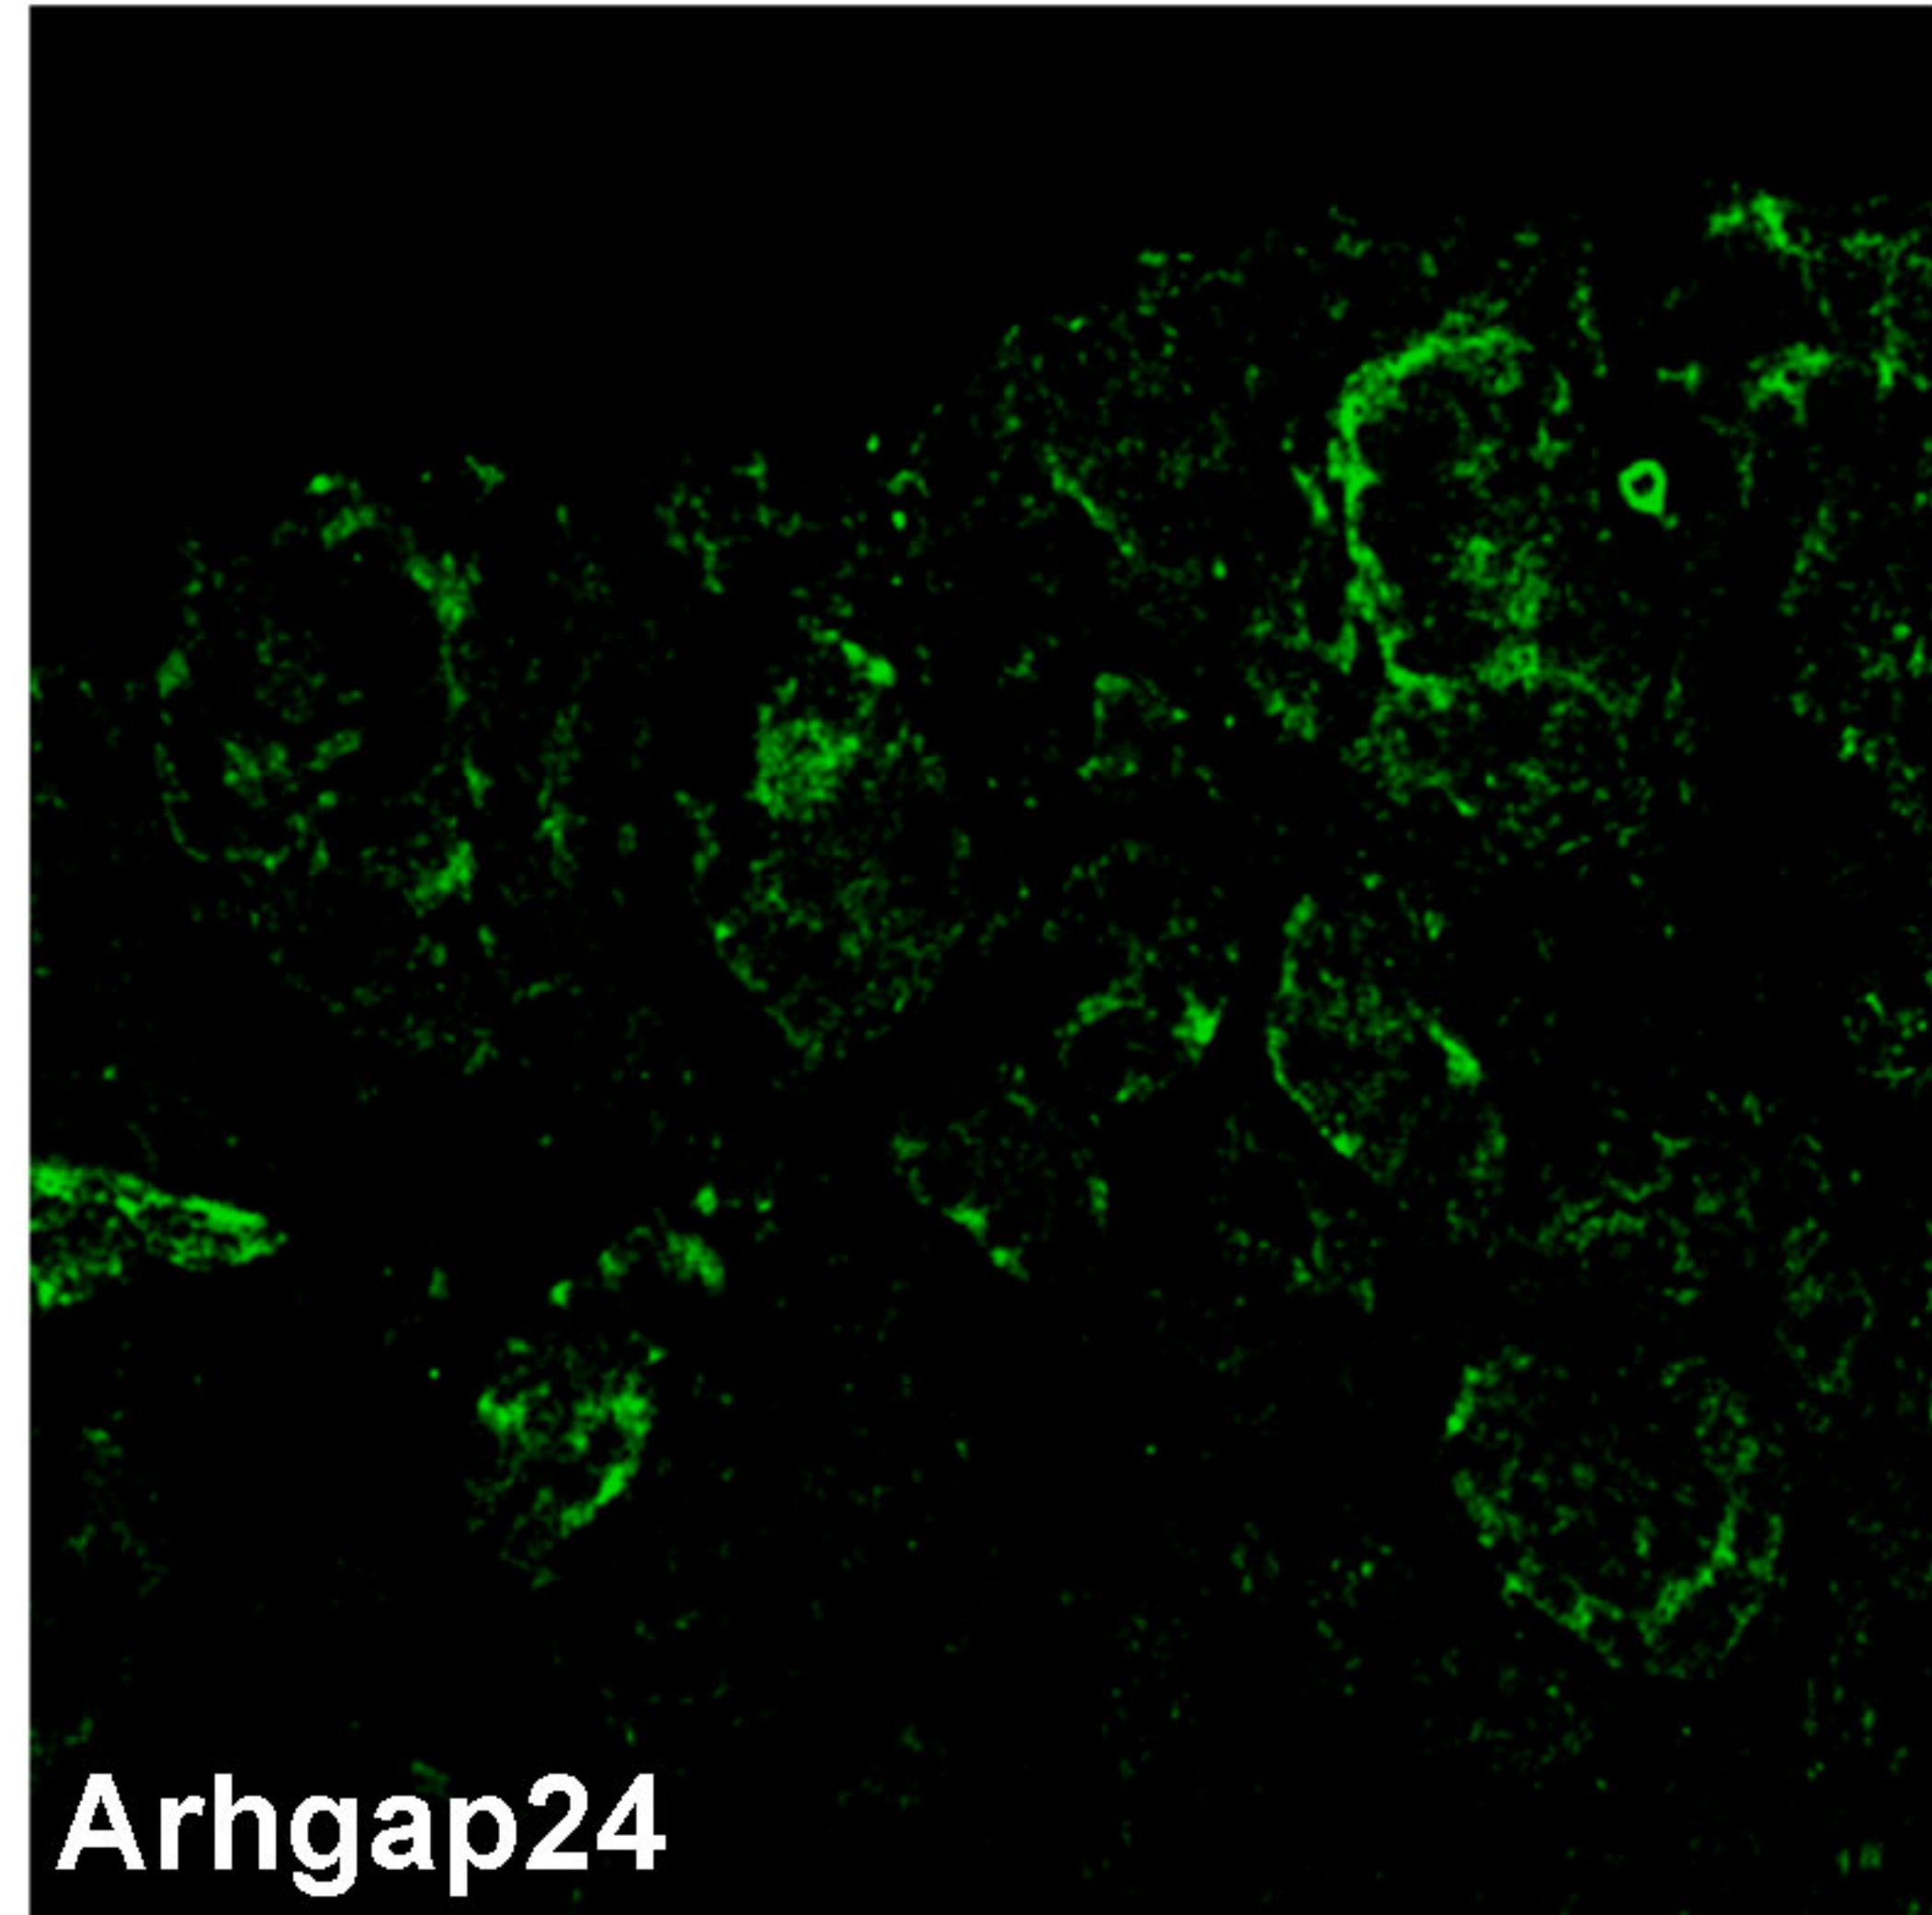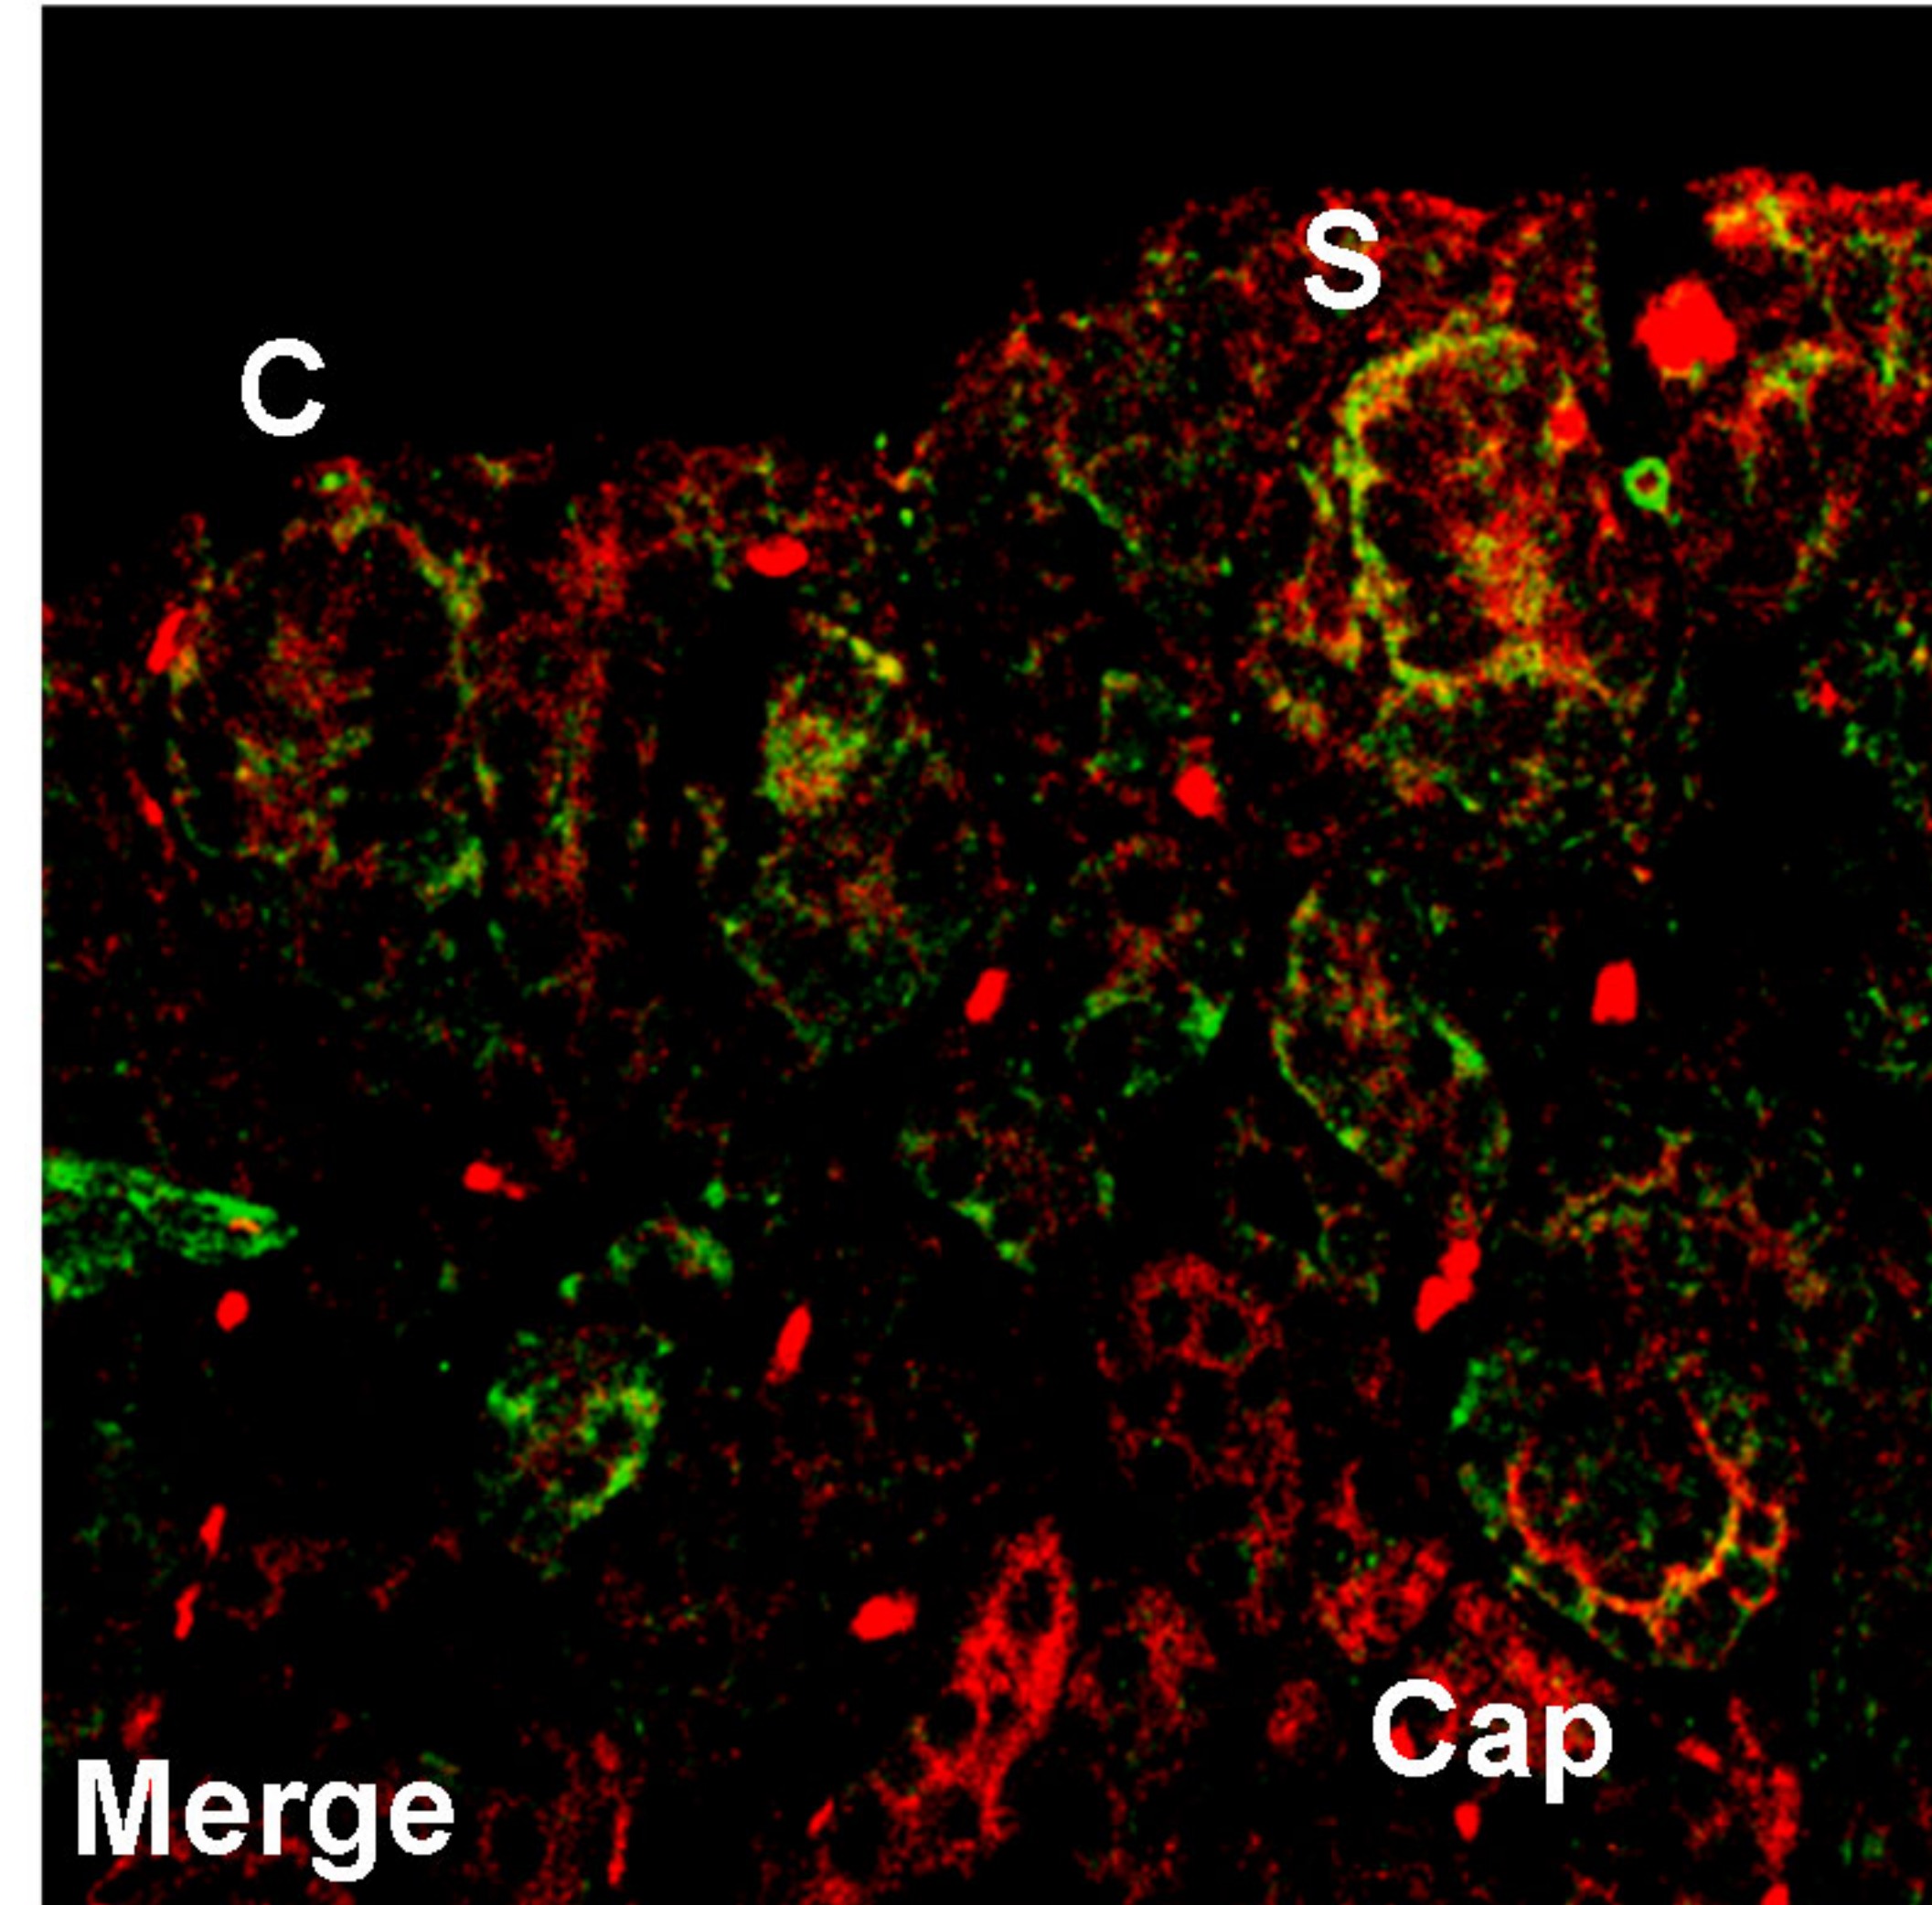



# Supplementary Figure 3

## T97I

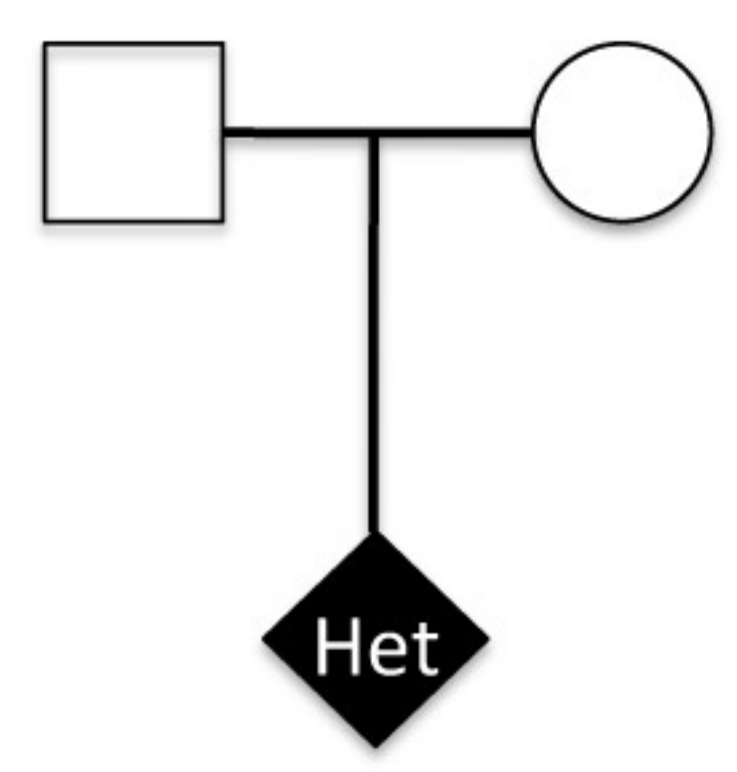

## P417A Pedigree #1

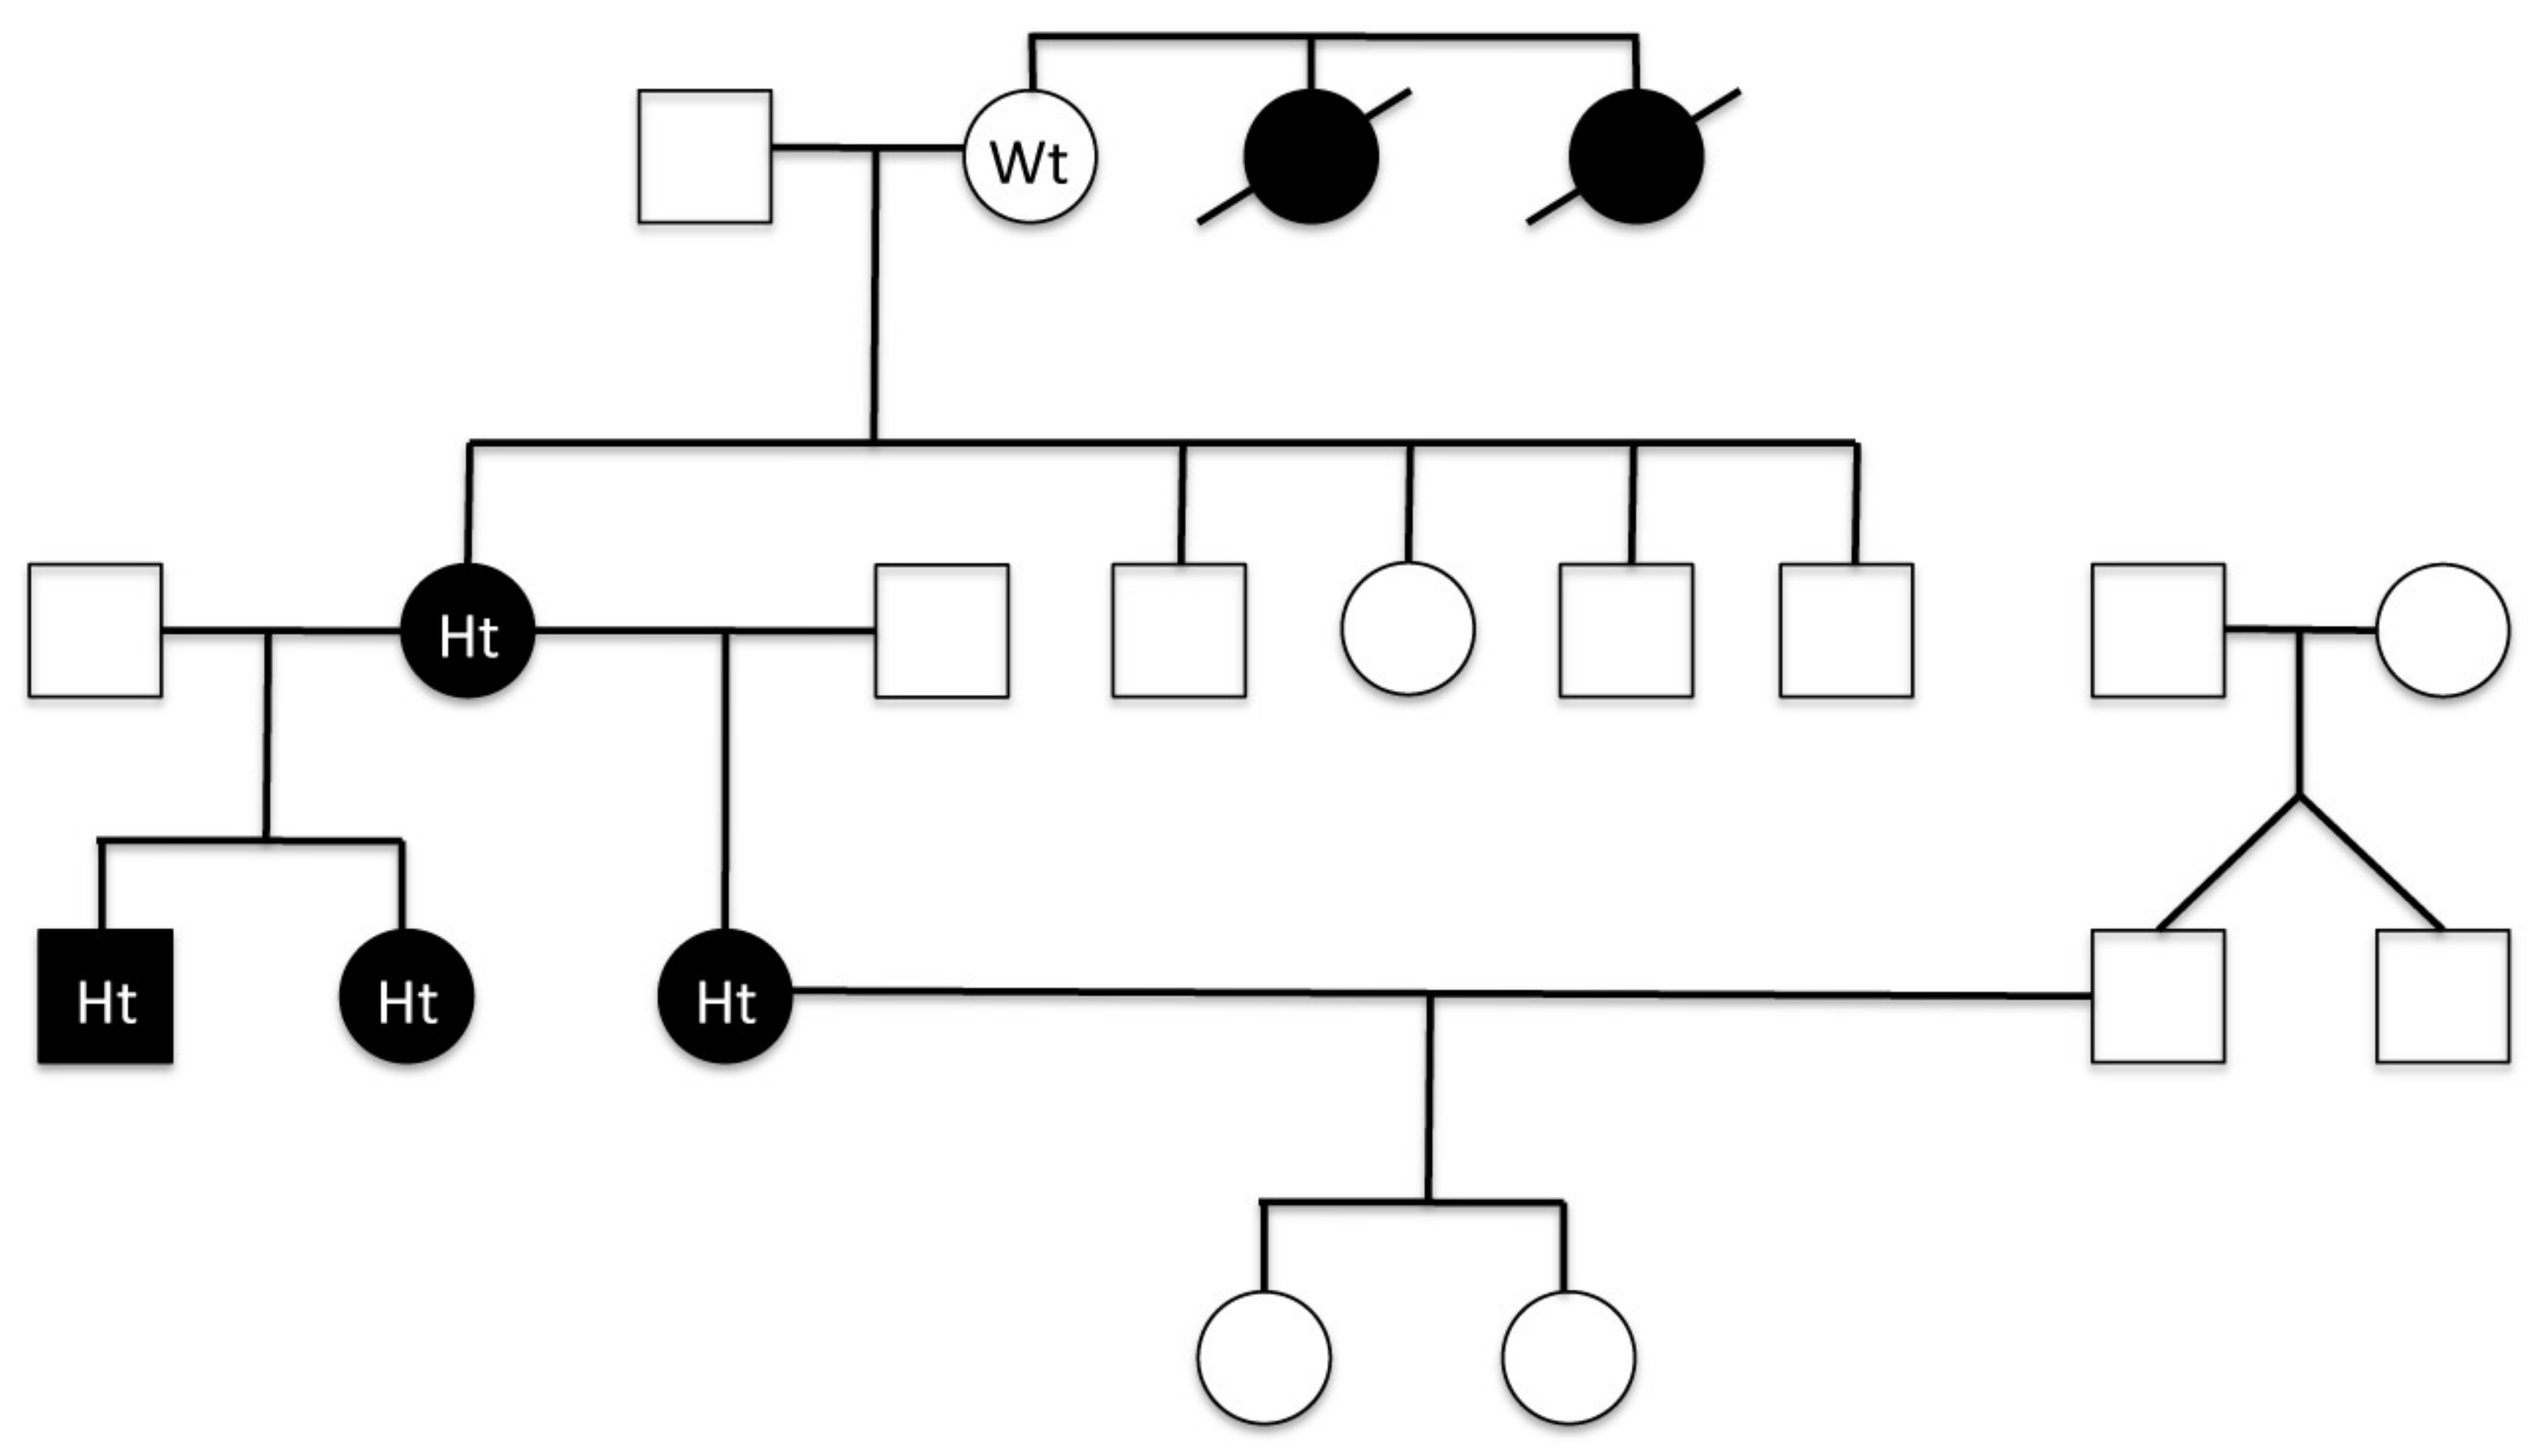

## P417A Pedigree #2

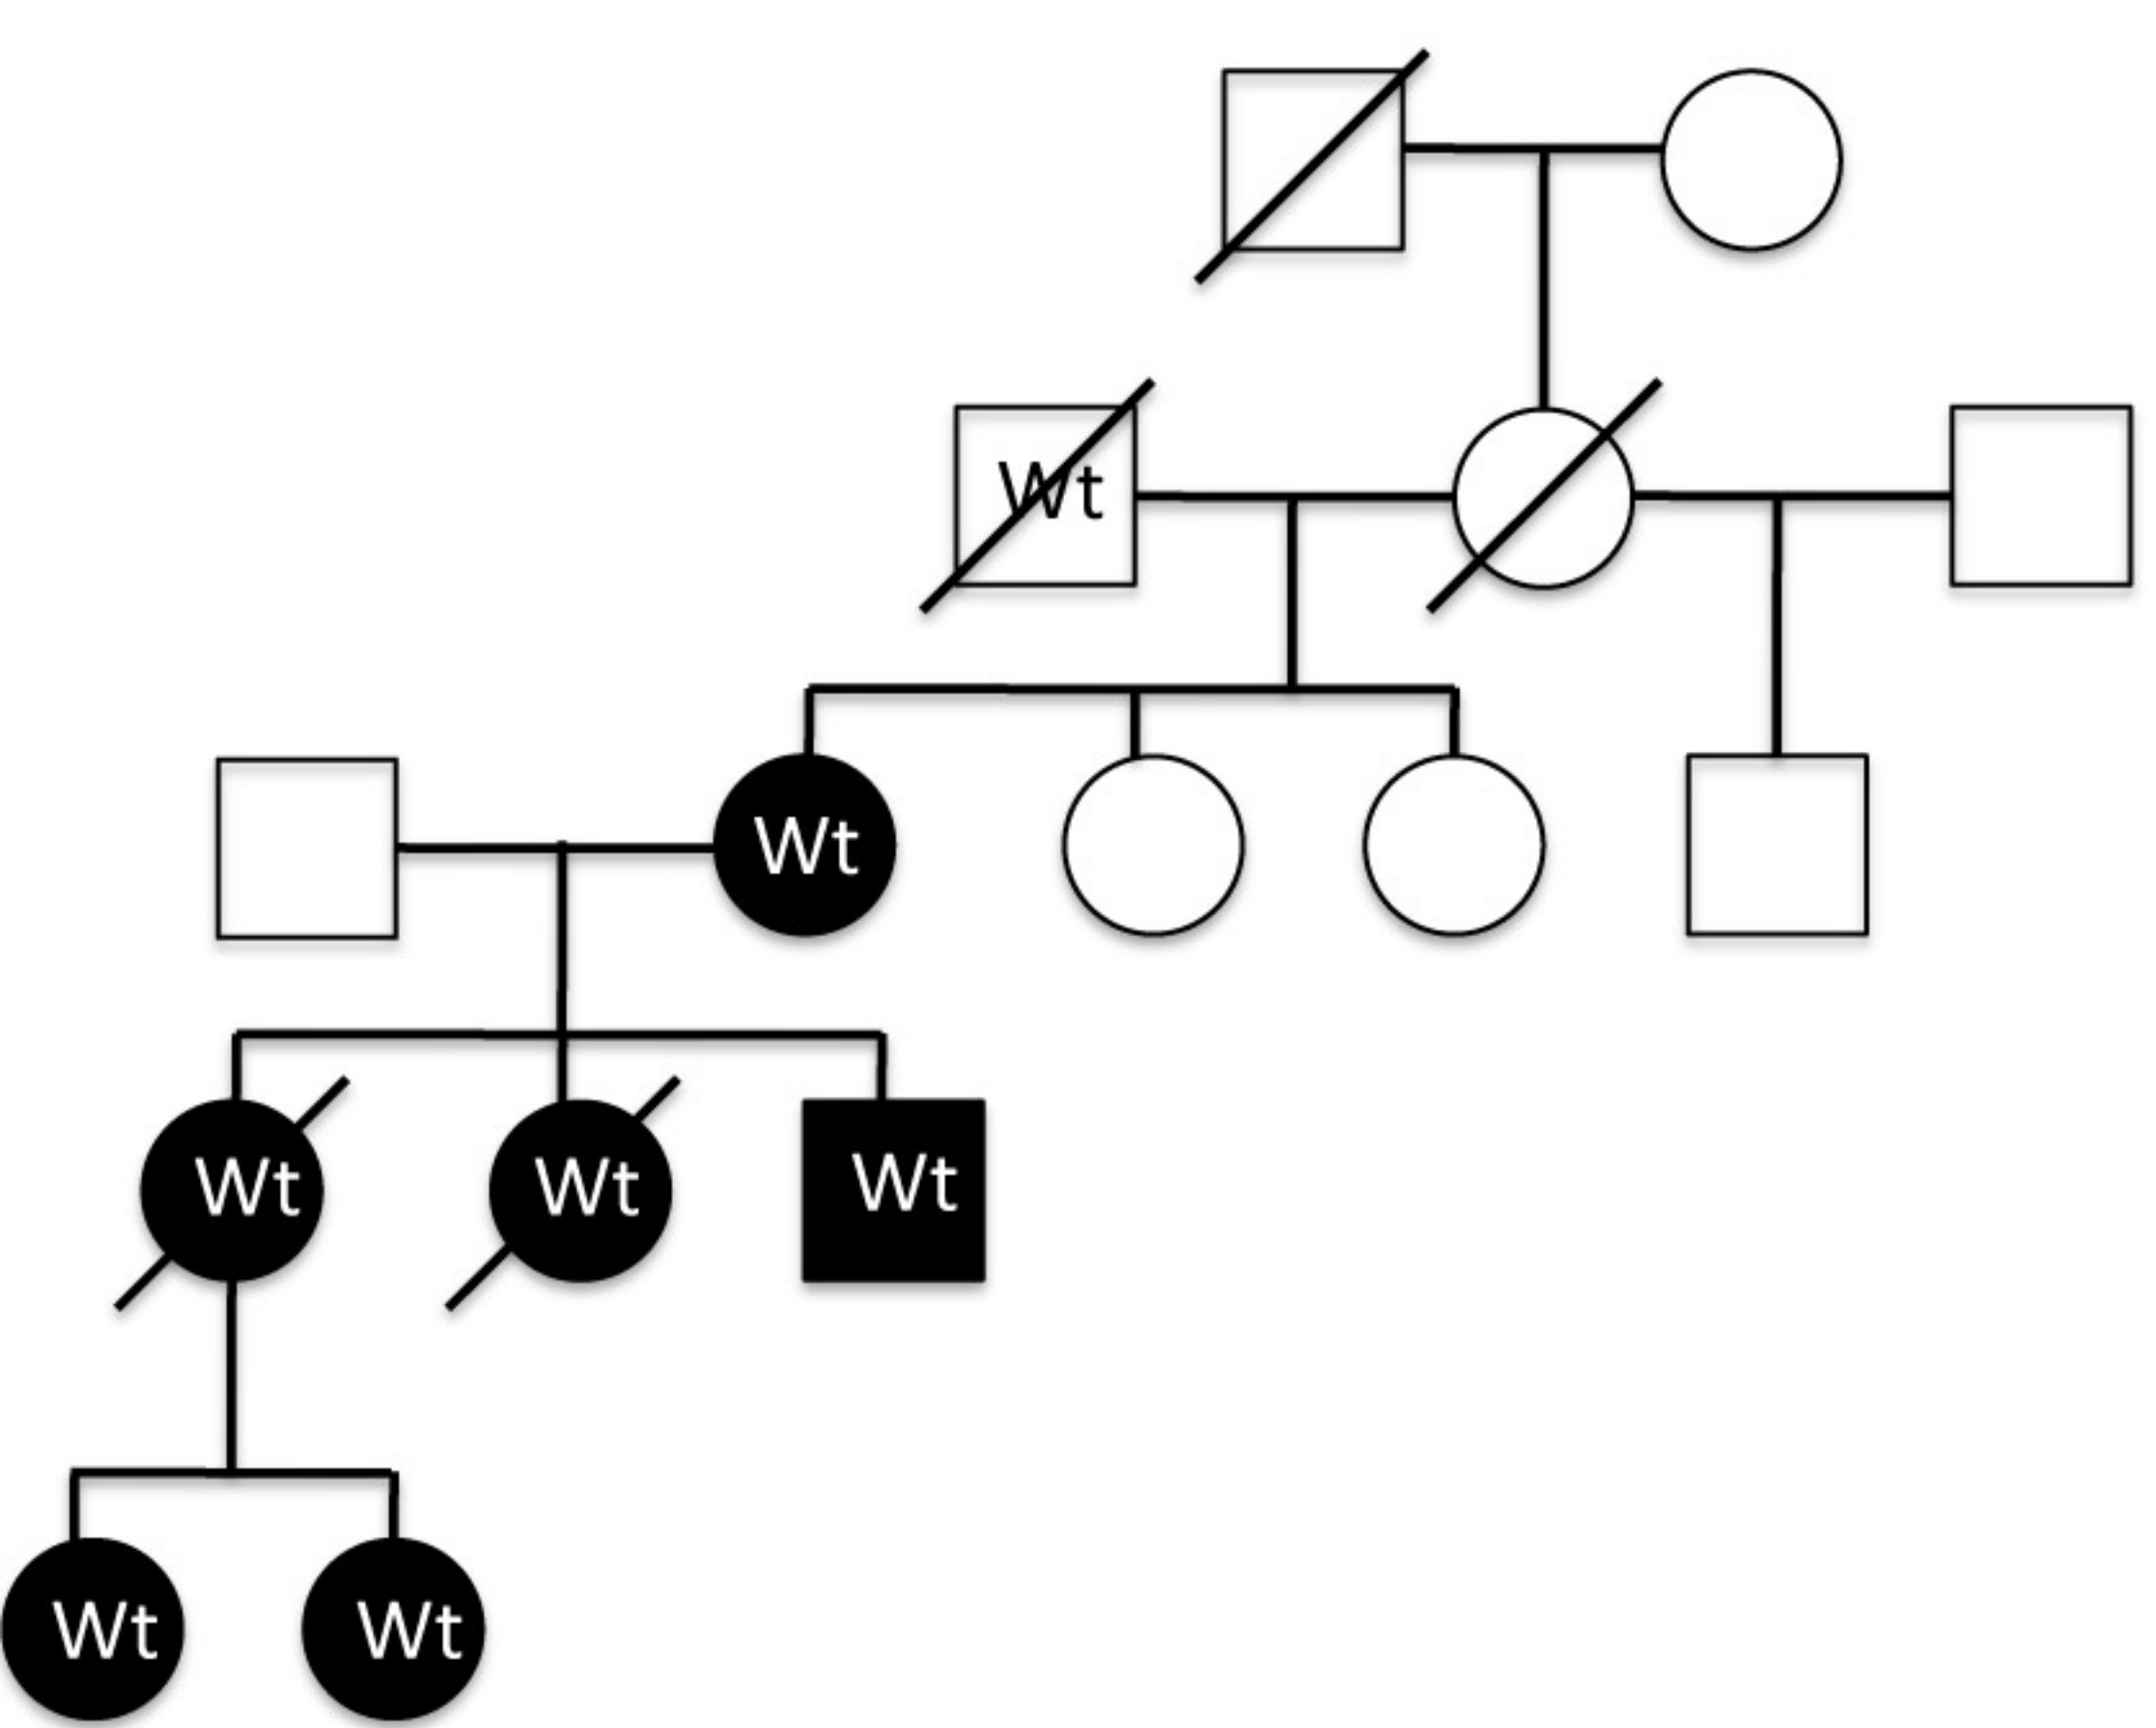

## P417A Pedigree #3

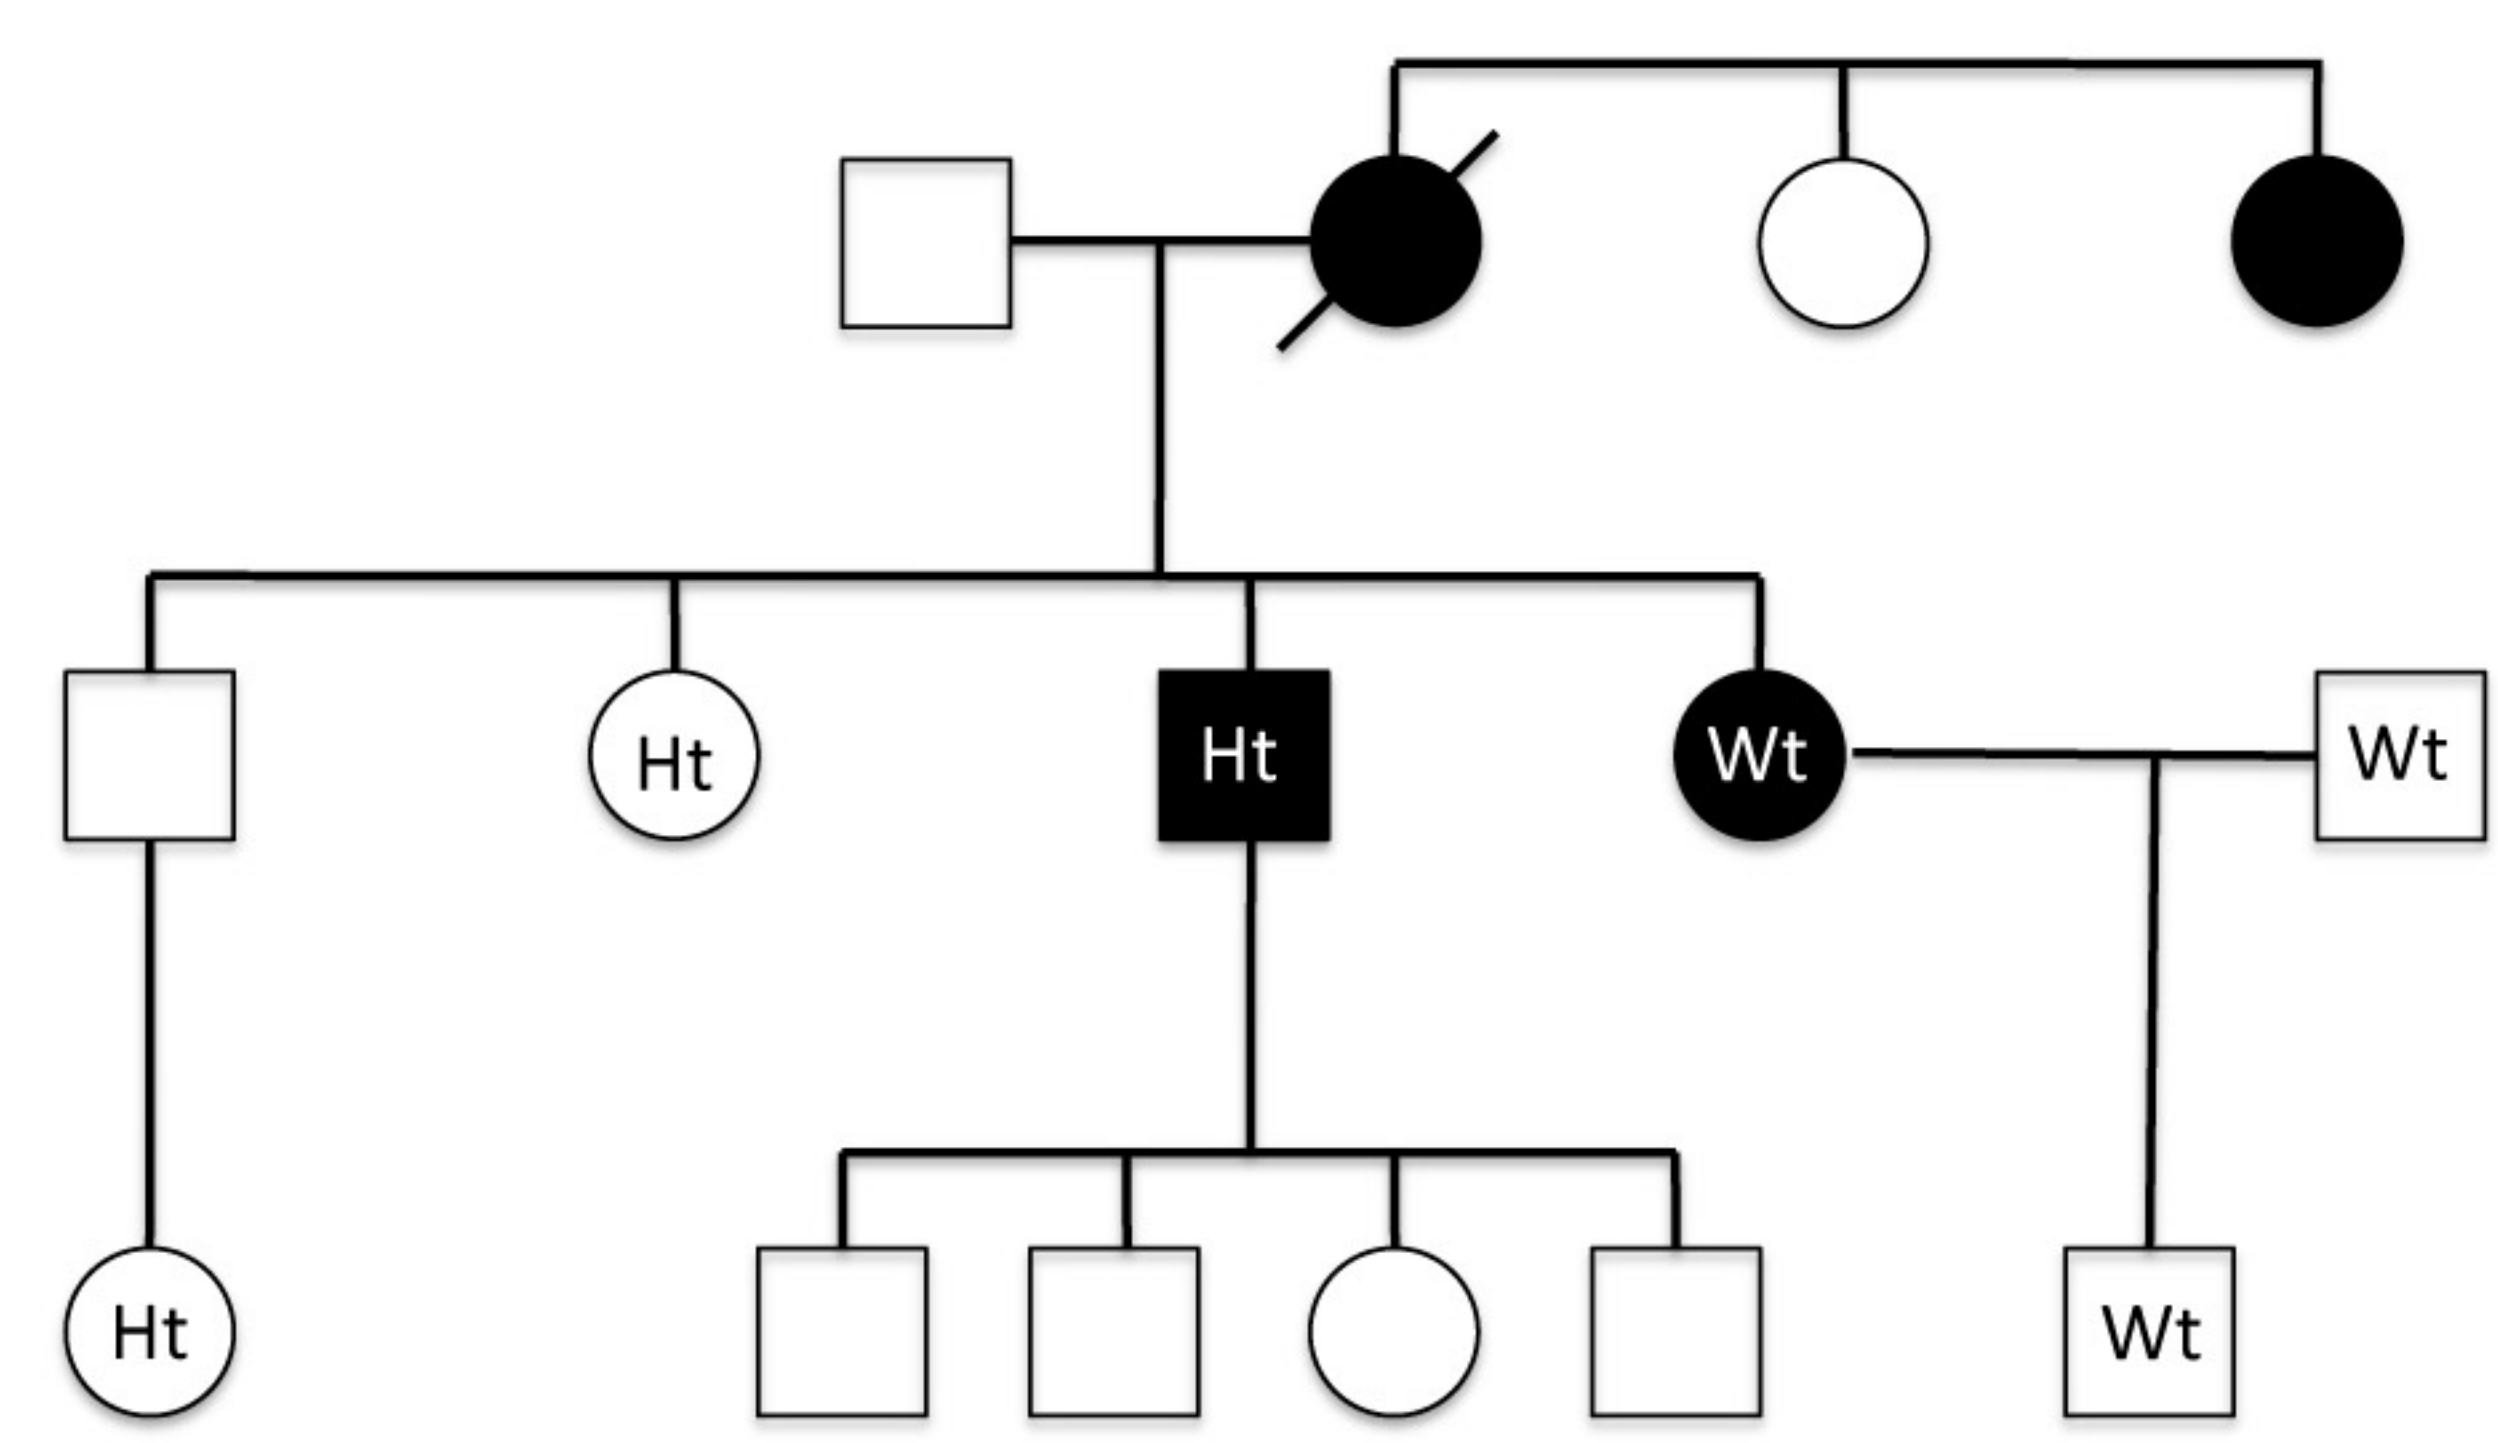



# Supplemental Figure 4

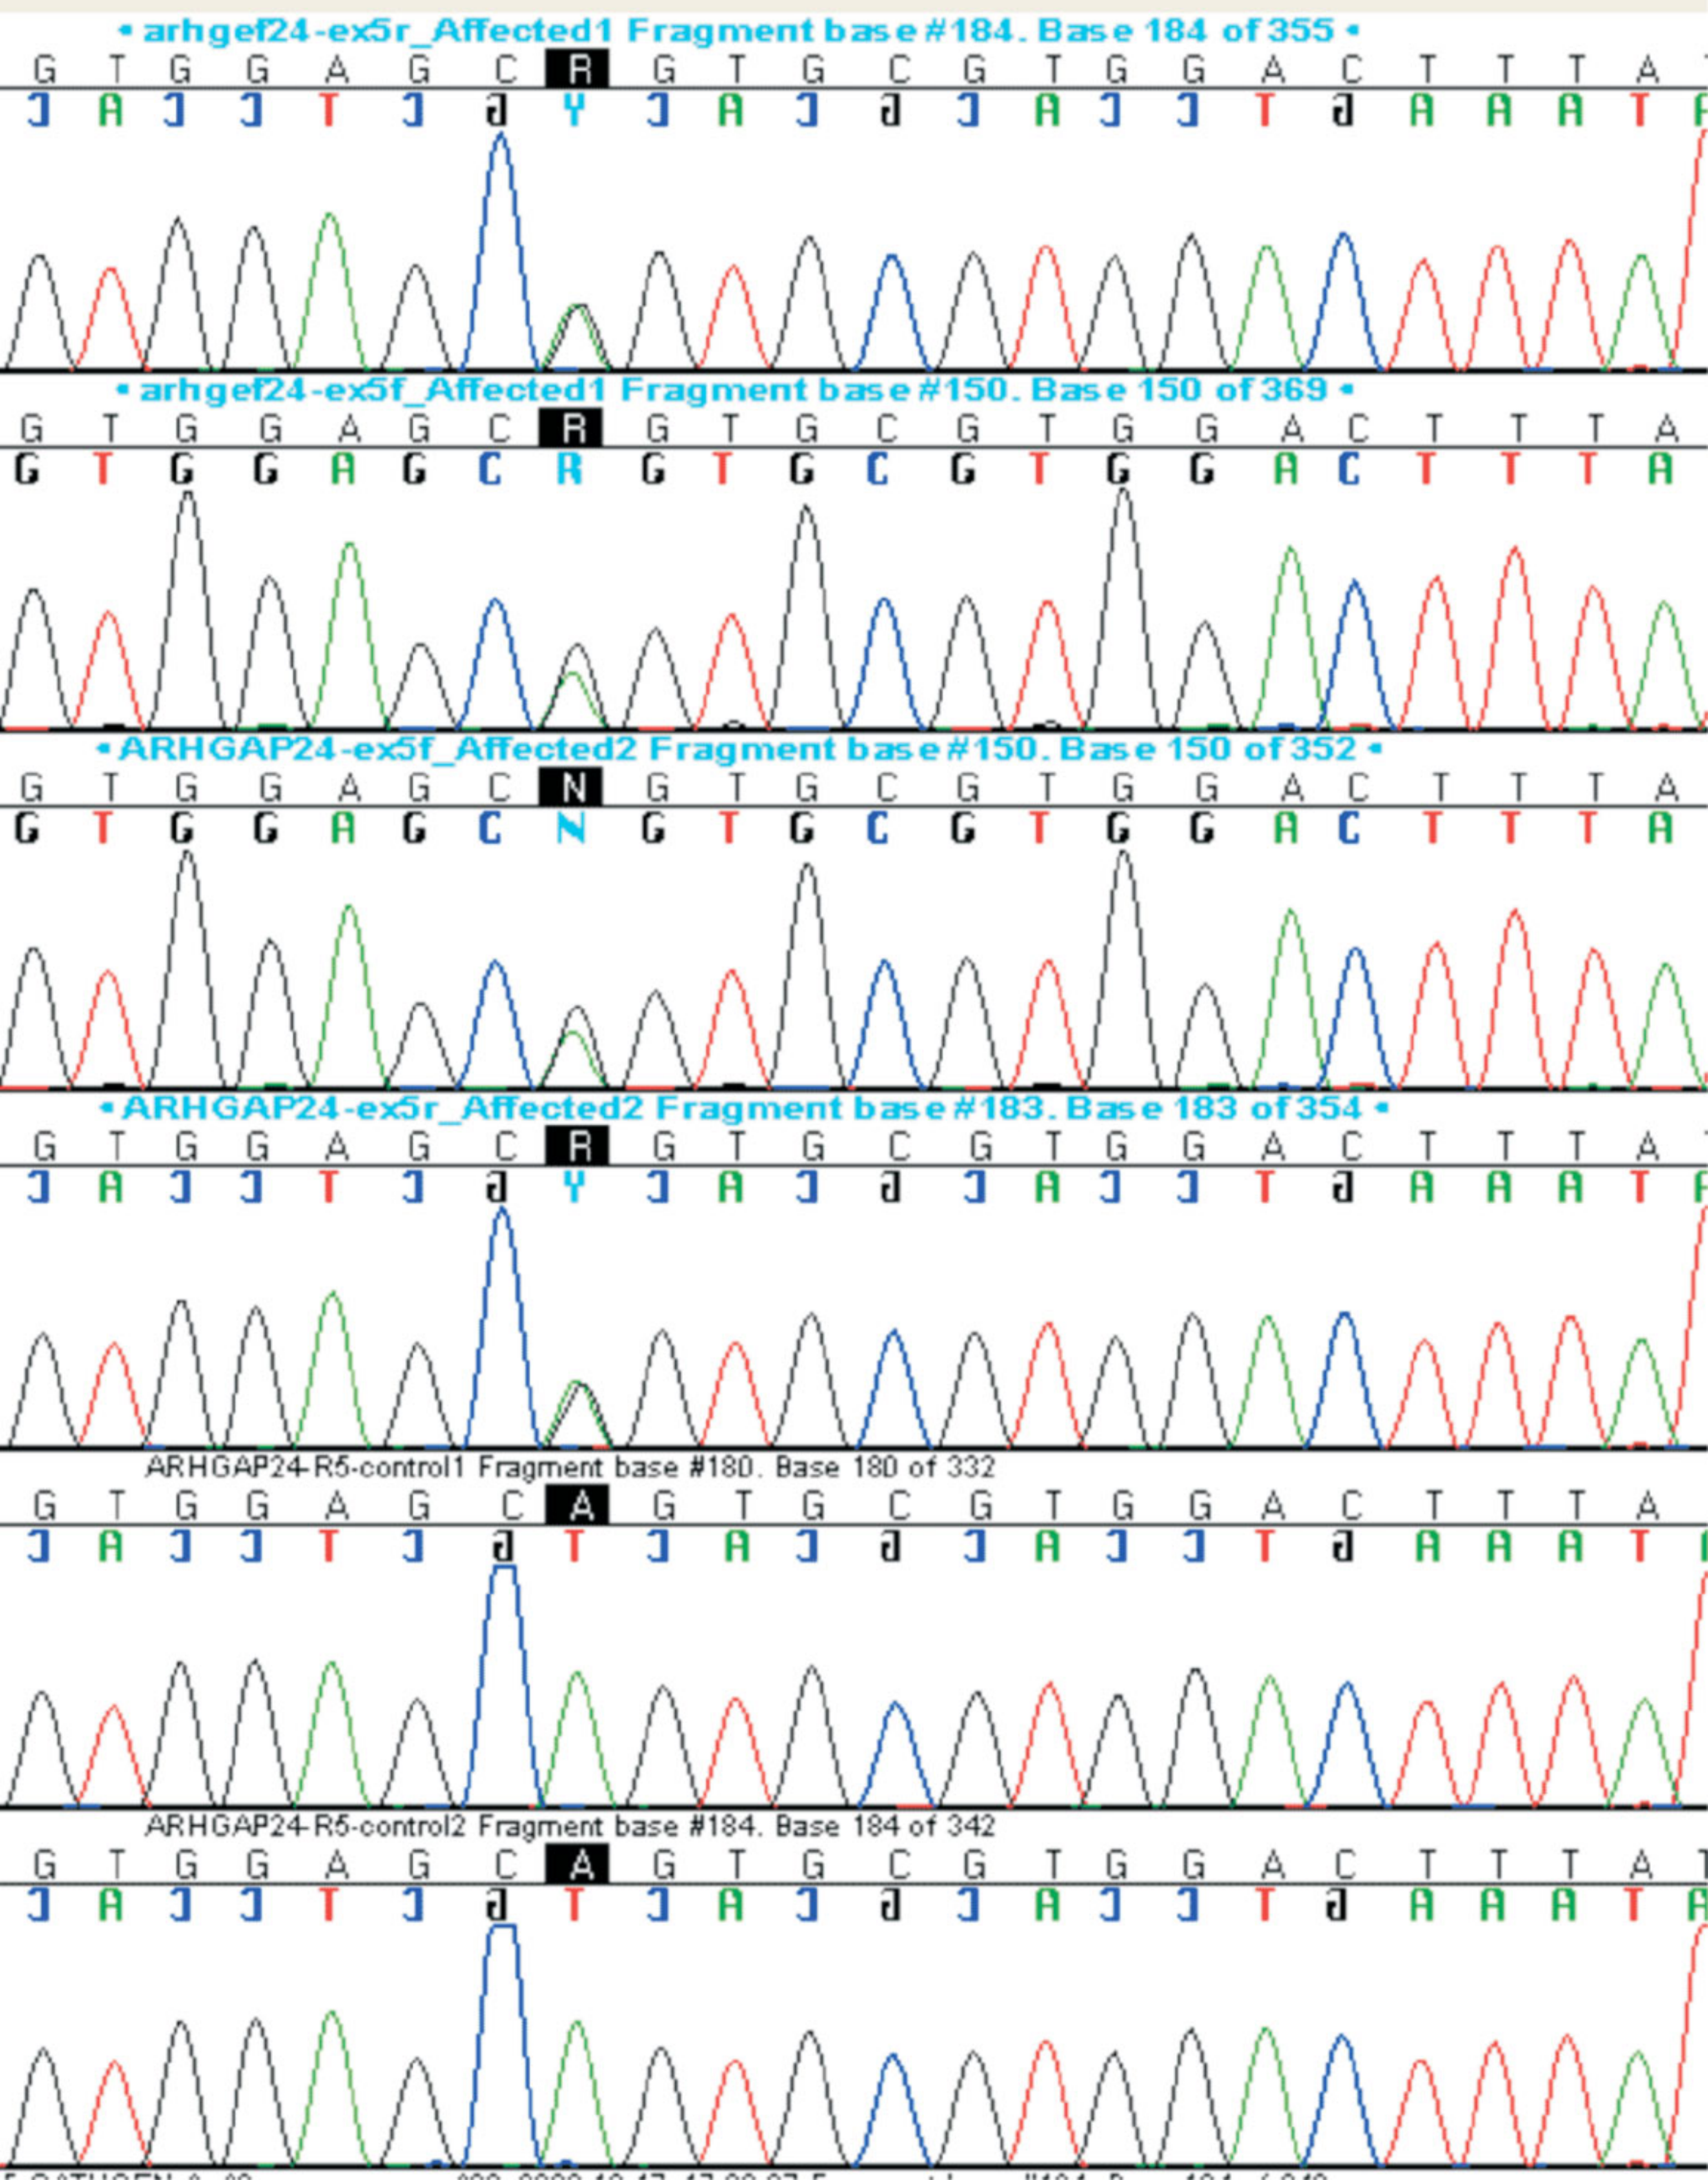

Supplement: JCI46458sd.pdf [file JCI46458sd.pdf]
